# Supplementary material
Source: publisher site journal article supplement (https://mbmg.pensoft.net/article/94298/download/suppl/33/)
Supplement: Supplementary file 1

## Sheet: Sheet2
Supplementary material 4. A specimen list of brittle star species collected from Sagami Bay in the last 10 years.
Registration number		Tentative Number 1		Tentative Number 2			Family	Generic name	Specific name	Author	Year	No. of specimens	Locality	Latitude (deg.)	Latitude (min.)	Latitude (sec)		Longitude (deg.)	Longitude (min.)	Longitude (sec)		Latitude (deg.)2	Latitude (min.)2	Latitude (N or S)2		Longitude (deg.)2	Longitude (min.)2	Longitude (E or W)2		Bottm depth 1 (m )	Botom depth 2 (m)	Vessel	Station	Date of sampling (Y)	Date of sampling (M)	Date of sampling (D)	Collector	Identified by
		Op-488	2				Amphiuridae	Amphiura	ancistrotus	H. L. Clark	1911	1	Off Jogashima, Misaki, Miura, Kanagawa, Japan																				St. 1	2011	10	24	Hisanori Kohtsuka
		Op-496	1				Amphiuridae	Amphiura	ancistrotus	H. L. Clark	1911	8	Enoshima, Kamakura, Kanagawa, Japan																				St. 2	2011	7	24	Hisanori Kohtsuka	Masanori Okanishi
		Op-846		121219	3		Amphiuridae	Amphiura	ancistrotus	H. L. Clark	1911	1	Off Jogashima, Misaki, Miura, Kanagawa, Japan	35	08	316	N	139	35	107	E	35	08	157	N	139	35	097	E	80	80	R/V Rinkai-Maru	St. 1	2012	12	19	Hisanori Kohtsuka	Masanori Okanishi
		Op-848		120419St.1	6	2	Amphiuridae	Amphiura	ancistrotus	H. L. Clark	1911	1	Off Jogashima, Misaki, Miura, Kanagawa, Japan	35	08	471	N	139	34	748	E	35	08	191	N	139	34	644	E	85	89.1	R/V Rinkai-Maru	St. 1	2014	2	19	Hisanori Kohtsuka	Masanori Okanishi
		Op-858		130724	1		Amphiuridae	Amphiura	ancistrotus	H. L. Clark	1911	1	Sagami Sea	35	08	913	N	139	34	268	E	35	08	993	N	139	34	809	E	85	84.1	R/V Rinkai-Maru	St. 1	2013	7	24	Hisanori Kohtsuka	Masanori Okanishi
		Op-867		626	2		Amphiuridae	Amphiura	ancistrotus	H. L. Clark	1911	5	Off Jogashima, Misaki, Miura, Kanagawa, Japan	35	08	422	N	139	34	686	E	35	08	190	N	139	34	676	E	86.8	87.7	R/V Rinkai-Maru	St. 1	2014	7	29	Hisanori Kohtsuka	Masanori Okanishi
		Op-872		1428	1	1	Amphiuridae	Amphiura	ancistrotus	H. L. Clark	1911	4	West of Jogashima, Misaki, Miura, Kanagawa, Japan	35	8	275	N	139	33	120	E	35	08	442	N	139	32	889	E	106	110	R/V Rinkai-Maru	st.2	2015	06	16	Hisanori Kohtsuka	Masanori Okanishi
		Op-887		3318	1		Amphiuridae	Amphiura	ancistrotus	H. L. Clark	1911	1	West of Jogashima, Misaki, Miura, Kanagawa, Japan	35	8	7801	N	139	34	3530	E	35	08	7100	N	139	34	0063	E	89	91.8	R/V Rinkai-Maru	St. 1	2018	04	17	Hisanori Kohtsuka	Masanori Okanishi
		Op-949		121024St.1	1	2	Amphiuridae	Amphiura	ancistrotus	H. L. Clark	1911	2	Goronba, Off Misaki, Miura, Kanagawa, Japan	35	11	193	N	139	34	758	E	35	10	845	N	139	34	453	E	79	97		St.1	2012	10	24	Hisanori Kohtsuka	Masanori Okanishi
		Op-951		121024St.1	5		Amphiuridae	Amphiura	ancistrotus	H. L. Clark	1911	9	Goronba, Off Misaki, Miura, Kanagawa, Japan	35	11	193	N	139	34	758	E	35	10	845	N	139	34	453	E	79	97		St.1	2012	10	24	Hisanori Kohtsuka	Masanori Okanishi
		Op-960		130725			Amphiuridae	Amphiura	ancistrotus	H. L. Clark	1911	1	Off Jogashima, Misaki, Miura, Kanagawa, Japan	35	08	379	N	139	34	692	E	35	08	471	N	139	34	389	E	87.3	90.5			2013	7	25	Hisanori Kohtsuka	Masanori Okanishi
		Op-1025		3229	1	2	Amphiuridae	Amphiura	ancistrotus	H. L. Clark	1911	1	West of Jogashima, Misaki, Miura, Kanagawa, Japan	35	09	0033	N	139	55	0001	E	35	08	6171	N	139	34	8529	E	75.9	79.7	R/V Rinkai-Maru	St. 5	2018	2	22	Hisanori Kohtsuka	Masanori Okanishi
				2880			Amphiuridae	Amphioplus	japonicus	Matsumoto	1915	1	Entrance of Moroiso Inlet																	0.8	0.8			2017	7	26	Hisanori Kohtsuka	Masanori Okanishi
				1075	3		Amphiuridae	Amphioplus	japonicus	Matsumoto	1915	1	West of Jogashima, Misaki, Miura, Kanagawa, Japan	35	08	5147	N	139	34	8157	E	35	08	1108	N	139	34	8027	E	80.7	85.7	R/V Rinkai-Maru	St. 3	2015	3	9	Hisanori Kohtsuka	Masanori Okanishi
		Op-466	3				Amphiuridae	Amphioplus	japonicus	Matsumoto	1915	3	Off Jogashima, Misaki, Miura, Kanagawa, Japan																	80	80			2011	5	19	Hisanori Kohtsuka	Masanori Okanishi
		Op-519-2		Op-519	2		Amphiuridae	Amphioplus	japonicus	Matsumoto	1915	1	West of Jogashima, Misaki, Miura, Kanagawa, Japan	35	07	301	N	139	33	365	E	35	07	327	N	139	32	978	E	300	493		St. 2	2012	2	24	Hisanori Kohtsuka	Masanori Okanishi
		Op-677		120419St.2	1		Amphiuridae	Amphioplus	japonicus	Matsumoto	1915	1	West of Jogashima, Misaki, Miura, Kanagawa, Japan	35	07	810	N	139	34	072	E	35	07	814	N	139	33	814	E	97.3	100	R/V Rinkai-Maru	St. 2	2012	4	19	Hisanori Kohtsuka	Masanori Okanishi
		Op-717		1075	1	3	Amphiuridae	Amphioplus	japonicus	Matsumoto	1915	1	West of Jogashima, Misaki, Miura, Kanagawa, Japan	35	08	5147	N	139	34	8157	E	35	08	1108	N	139	34	8027	E	80.7	85.7	R/V Rinkai-Maru	St. 3	2015	3	9	Hisanori Kohtsuka	Masanori Okanishi
		Op-786		3070			Amphiuridae	Amphioplus	japonicus	Matsumoto	1915	1	Around Kijima, Ushimado, Okayama, Japan	34	36	113	N	134	11	733	E									15.7	15.7	R/V Hayate	St. 2	2017	12	13	Hisanori Kohtsuka	Masanori Okanishi
		Op-803		598	3		Amphiuridae	Amphioplus	japonicus	Matsumoto	1915	3	Off Jogashima, Misaki, Miura, Kanagawa, Japan	35	08	359	N	139	34	753	E	35	08	649	N	139	34	328	E	85.5	91.4	R/V Rinkai-Maru	St. 1	2014	7	28	Hisanori Kohtsuka	Masanori Okanishi
		Op-803		598	3		Amphiuridae	Amphioplus	japonicus	Matsumoto	1915	3	Off Jogashima, Misaki, Miura, Kanagawa, Japan	35	08	359	N	139	34	753	E	35	08	649	N	139	34	328	E	85.5	91.4	R/V Rinkai-Maru	St. 1	2014	7	28	Hisanori Kohtsuka	Masanori Okanishi
		Op-885		140219St.1	1	4	Amphiuridae	Amphioplus	japonicus	Matsumoto	1915	1	Off Jogashima, Misaki, Miura, Kanagawa, Japan	35	08	471	N	139	34	748	E	35	08	191	N	139	34	644	E	85	89.1	R/V Rinkai-Maru	St. 1	2014	2	19	Hisanori Kohtsuka	Masanori Okanishi
		Op-958		130725			Amphiuridae	Amphioplus	japonicus	Matsumoto	1915	1	Off Jogashima, Misaki, Miura, Kanagawa, Japan	35	08	379	N	139	34	692	E	35	08	471	N	139	34	389	E	87.3	90.5			2013	7	25	Hisanori Kohtsuka	Masanori Okanishi
				MO-2021-64			Amphiuridae	Amphioplus	japonicus	Matsumoto	1915	2	Sagami Sea	35	04	406	N	139	35	539	E	35	04	444	N	139	35	310	E	326	321	R/V Tansei	L-2'-350	2007	11	28	Masanori Okanishi	Masanori Okanishi
		Op-485					Amphiuridae	Amphioplus	macraspis	H. L. Clark	1911	1	Off MarinePark, Misaki, Miura, Kanagawa, Japan																	50				2011	9	15	Hisanori Kohtsuka	Masanori Okanishi
		Op-638		2727			Amphiuridae	Amphioplus	macraspis	H. L. Clark	1911	1	West of Jogashima, Misaki, Miura, Kanagawa, Japan	35	07	055	N	139	33	409	E	35	96	719	N	139	33	242	E	509	448	R/V Rinkai-Maru	St. 3	2017	2	15	Hisanori Kohtsuka	Masanori Okanishi
		Op-638		2727			Amphiuridae	Amphioplus	macraspis	H. L. Clark	1911	1	West of Jogashima, Misaki, Miura, Kanagawa, Japan	35	07	055	N	139	33	409	E	35	96	719	N	139	33	242	E	509	448	R/V Rinkai-Maru	St. 3	2017	2	15	Hisanori Kohtsuka	Masanori Okanishi
		Op-938		121025St.2	1		Amphiuridae	Amphioplus	macraspis	H. L. Clark	1911	3	West of Jogashima, Misaki, Miura, Kanagawa, Japan	35	07	044	N	139	33	878	E	35	06	421	N	139	33	810	E	314	396		St. 2	2012	10	25	Hisanori Kohtsuka	Masanori Okanishi
		Op-568	1				Amphiuridae	Amphioplus	rhadinobrachius	H. L. Clark	1911	11	West of Jogashima, Misaki, Miura, Kanagawa, Japan																				St.1	2010	6	24	Hisanori Kohtsuka	Masanori Okanishi
		Op-667		1881	2		Amphiuridae	Amphioplus	rhadinobrachius	H. L. Clark	1911	1	West of Jogashima, Misaki, Miura, Kanagawa, Japan	35	06	9490	N	139	33	7381	E	35	06	7231	N	139	34	0574	E	398	230	R/V Rinkai-Maru	St. 5	2015	12	10	Hisanori Kohtsuka	Masanori Okanishi
		Op-667		1881	2		Amphiuridae	Amphioplus	rhadinobrachius	H. L. Clark	1911	1	West of Jogashima, Misaki, Miura, Kanagawa, Japan	35	06	9490	N	139	33	7381	E	35	06	7231	N	139	34	0574	E	398	230	R/V Rinkai-Maru	St. 5	2015	12	10	Hisanori Kohtsuka	Masanori Okanishi
				MO-2021-68			Amphiuridae	Amphioplus	rhadinobrachius	H. L. Clark	1911	1	West of Jogashima, Misaki, Miura, Kanagawa, Japan																			R/V Rinkai-Maru	St. 3	2021	3	12	Hisanori Kohtsuka/Masanori Okanishi	Masanori Okanishi
		Op-828		1848	3		Amphiuridae	Amphioplus	trachydisca	H. L. Clark	1911	1	West of Jogashima, Misaki, Miura, Kanagawa, Japan	35	7	3455	N	139	34	2564	E	35	07	1502	N	139	33	8646	E	219	320		st.4	2015	12	10	Hisanori Kohtsuka	Masanori Okanishi
				3039	2		Amphiuridae	Amphipholis	squamata	Delle Chiaje	1828	1	Off Tateyama, Chiba, Japan	34	58	559	N	139	46	388	E				N				E	30	30	T/V Sagitta VI	St. 1	2017	11	22	Hisanori Kohtsuka	Masanori Okanishi
		Op-518					Amphiuridae	Amphipholis	squamata	Delle Chiaje	1828	1	Off Jogashima, Misaki, Miura, Kanagawa, Japan	35	07	301	N	139	33	365	E	35	07	327	N	139	32	978	E	300	493		St. 1	2012	2	24	Hisanori Kohtsuka	Masanori Okanishi
		Op-706		1344	1		Amphiuridae	Amphipholis	squamata	Delle Chiaje	1828	1	West of Jogashima, Misaki, Miura, Kanagawa, Japan	35	06	2660	N	139	34	0555	E	35	06	4784	N	139	33	6244	E	250	484	R/V Rinkai-Maru	St. 4	2015	5	28	Hisanori Kohtsuka	Masanori Okanishi
		Op-709		325			Amphiuridae	Amphipholis	squamata	Delle Chiaje	1828	1	Araihama, Misaki, Kanagawa, Japan																					2014	5	27	Hisanori Kohtsuka	Masanori Okanishi
		Op-714		100624St.2	1		Amphiuridae	Amphipholis	squamata	Delle Chiaje	1828	7	West of Jogashima, Misaki, Miura, Kanagawa, Japan	35	08	700	N	139	34	300	E	35	08	421	N	139	34	197	E	92.3	91.8	R/V Rinkai-Maru	St. 2	2010	10	6	Hisanori Kohtsuka	Masanori Okanishi
		Op-753		2219			Amphiuridae	Amphipholis	squamata	Delle Chiaje	1828	4	West of Jogashima, Misaki, Miura, Kanagawa, Japan	35	07	3045	N	139	34	0526	E	35	07	3806	N	139	33	3882	E	208	271	R/V Rinkai-Maru	St. 1	2016	4	26	Hisanori Kohtsuka	Masanori Okanishi
		Op-760		518	2		Amphiuridae	Amphipholis	squamata	Delle Chiaje	1828	1	Entrance of Moroiso Inlet, Miura, Kanagawa, Japan																	5	6			2014	7	7	Hisanori Kohtsuka	Masanori Okanishi
		Op-808		871	2		Amphiuridae	Amphipholis	squamata	Delle Chiaje	1828	1	Entrance of Moroiso Inlet, Miura, Kanagawa, Japan	35	09	450	N	139	36	570	E									4.5	5.5		St. 3	2015	1	19	Hisanori Kohtsuka	Masanori Okanishi
		Op-816		1577	2		Amphiuridae	Amphipholis	squamata	Delle Chiaje	1828	1	West of Jogashima, Misaki, Miura, Kanagawa, Japan	35	07	239	N	139	33	522	E	35	07	389	N	139	33	209	E	267	309	R/V Rinkai-Maru	St. 3	2014	10	20	Hisanori Kohtsuka	Masanori Okanishi
		Op-832		2407			Amphiuridae	Amphipholis	squamata	Delle Chiaje	1828	1	Aburatsubo, Misaki, Miura, Kanagawa, Japan																					2016	9	15	Hisanori Kohtsuka	Masanori Okanishi
		Op-873		130501St.2	1	2	Amphiuridae	Amphipholis	squamata	Delle Chiaje	1828	1	Off Jogashima, Misaki, Miura, Kanagawa, Japan	35	08	957	N	139	34	749	E									88	92	R/V Rinkai-Maru	St. 2	2013	5	1	Hisanori Kohtsuka	Masanori Okanishi
		Op-877		121219	5	2	Amphiuridae	Amphipholis	squamata	Delle Chiaje	1828	1	Off Jogashima, Misaki, Miura, Kanagawa, Japan	35	08	316	N	139	35	107	E	35	08	157	N	139	35	097	E	78.6	80	R/V Rinkai-Maru	St. 1	2012	12	19	Hisanori Kohtsuka	Masanori Okanishi
		Op-943		3039	1		Amphiuridae	Amphipholis	squamata	Delle Chiaje	1828	2	Off Tateyama, Chiba, Japan	34	58	559	N	139	46	388	E	-			N				E	30			St. 1	2017	11	22	Hisanori Kohtsuka	Masanori Okanishi
		Op-945		120113St.2	2	2	Amphiuridae	Amphipholis	squamata	Delle Chiaje	1828	1	Off Jogashima, Misaki, Miura, Kanagawa, Japan	35	06	041	N	139	34	049	E	35	06	303	N	139	34	465	E	364	158	R/V Rinkai-Maru	St.2	2012	1	13	Hisanori Kohtsuka	Masanori Okanishi
		Op-1075		130618			Amphiuridae	Amphipholis	squamata	Delle Chiaje	1828	1	Tachiamamo, Moroiso Inlet, Misaki, Miura, Japan																	5	6			2013	6	18	Hisanori Kohtsuka	Masanori Okanishi
				MO-2021-12			Amphiuridae	Amphipholis	squamata	Delle Chiaje	1828	2	Off Araihama, Misaki, Miura, Miura, Kanagawa, Japan									35	10	239	N	139	35	450	E	60	60		St. 2	2021	4	22	Hisanori Kohtsuka, Michiyo Kawabata, Kohei Otomo, Ryosuke Kimbara, Masanori Okanishi	Masanori Okanishi
				MO-2021-15			Amphiuridae	Amphipholis	squamata	Delle Chiaje	1828	2	Off Araihama, Misaki, Miura, Miura, Kanagawa, Japan									35	10	239	N	139	35	450	E	60	60		St. 2	2021	4	22	Hisanori Kohtsuka, Michiyo Kawabata, Kohei Otomo, Ryosuke Kimbara, Masanori Okanishi	Masanori Okanishi
		Op-726		3019	2		Amphiuridae	Amphiura	ancistrotus	Lyman	1878	1	Off Jogashima, Misaki, Miura, Kanagawa, Japan																			R/V Shinyo		2017	10	27	Hisanori Kohtsuka	Masanori Okanishi
		Op-734		MO-2021-10			Amphiuridae	Amphiura	ancistrotus	Lyman	1878	4	Off Jogashima, Misaki, Miura, Kanagawa, Japan	35	07	054	N	139	33	990	E	35	07	64	N	139	33	662	E	384	478	R/V Rinkai-Maru	St. 3	2020	7	30	Masanori Okanishi	Masanori Okanishi
		Op-734		MO-2021-10			Amphiuridae	Amphiura	ancistrotus	Lyman	1878	4	Off Jogashima, Misaki, Miura, Kanagawa, Japan	35	07	054	N	139	33	990	E	35	07	64	N	139	33	662	E	384	478	R/V Rinkai-Maru	St. 3	2020	7	30	Masanori Okanishi	Masanori Okanishi
				MO-2021-47			Amphiuridae	Amphiura	ancistrotus	H. L. Clark	1911	1	Sagami Sea	35	03	412	N	139	12	552	E	35	02	726	N	139	13	733	E	563	756	R/V Tansei	L-1-800	2007	11	24	Masanori Okanishi	Masanori Okanishi
				MO-2021-45			Amphiuridae	Amphiura	arcystata	H. L. Clark	1911	1	Sagami Sea	35	03	045	N	139	12	275	E	35	02	819	N	139	12	006	E	510	255	R/V Tansei	L-1-500	2007	11	25	Masanori Okanishi	Masanori Okanishi
		Op-754		2766	3	1	Amphiuridae	Amphiura	bellis	Lyman	1879	2	West of Jogashima, Misaki, Miura, Kanagawa, Japan	35	06	9342	N	139	33	5569	E	35	06	6013	N	139	33	1174	E	440	541	R/V Rinkai-Maru	St. 6	2017	2	16	Hisanori Kohtsuka	Masanori Okanishi
				MO-20			Amphiuridae	Amphiura	bellis	Lyman	1879	1	West of Jogashima, Misaki, Miura, Kanagawa, Japan	35	04	444		139	33	852		35	03	914	N	139	33	662	E	614	755	R/V Rinkai-Maru	St.1	2015	1	20	Hisanori Kohtsuka	Masanori Okanishi
				MO-2021-66			Amphiuridae	Amphiura	bellis	Lyman	1879	1	Sagami Sea	35	04	792	N	139	35	272	E	35	04	863	N	139	35	122	E	223	221	R/V Tansei	L-2'-200	2007	11	28	Masanori Okanishi	Masanori Okanishi
		Op-829		MO-2021-62			Amphiuridae	Amphiura	carchara	H. L. Clark	1911	1	Sagami Sea	34	36	950	N	139	15	807	E	34	36	704	N	139	16	367	E	316	328	R/V Tansei	L-3-300	2007	11	27	Masanori Okanishi	Masanori Okanishi
		Op-829		MO-2021-62			Amphiuridae	Amphiura	carchara	H. L. Clark	1911	1	Sagami Sea	34	36	950	N	139	15	807	E	34	36	704	N	139	16	367	E	316	328	R/V Tansei	L-3-300	2007	11	27	Masanori Okanishi	Masanori Okanishi
				MO-2021-59			Amphiuridae	Amphiura	carchara	H. L. Clark	1911	2	Sagami Sea	35	03	965	N	139	34	934	E	35	04	268	N	139	34	957	E	604	407	R/V Tansei	L-2'-600	2007	11	28	Masanori Okanishi	Masanori Okanishi
				MO-2021-65			Amphiuridae	Amphiura	carchara	H. L. Clark	1911	2	Sagami Sea	35	04	406	N	139	35	539	E	35	04	444	N	139	35	310	E	326	321	R/V Tansei	L-2'-350	2007	11	28	Masanori Okanishi	Masanori Okanishi
		Op-433					Amphiuridae	Amphiura	euopla	H. L. Clark	1911	4	Off Jogashima, Misaki, Miura, Kanagawa, Japan																	85				2009	5	15	Hisanori Kohtsuka	Masanori Okanishi
		Op-466	2				Amphiuridae	Amphiura	euopla	H. L. Clark	1911	1	Off Jogashima, Misaki, Miura, Kanagawa, Japan																	80	80			2011	5	19	Hisanori Kohtsuka	Masanori Okanishi
		Op-467	2				Amphiuridae	Amphiura	euopla	H. L. Clark	1911	2	Off Jogashima, Misaki, Miura, Kanagawa, Japan																					2011	5	19	Hisanori Kohtsuka	Masanori Okanishi
		Op-478					Amphiuridae	Amphiura	euopla	H. L. Clark	1911	3	Off Jogashima, Misaki, Miura, Kanagawa, Japan																					2011	6	30	Hisanori Kohtsuka	Masanori Okanishi
		Op-496	2				Amphiuridae	Amphiura	euopla	H. L. Clark	1911	1	Enoshima, Kamakura, Kanagawa, Japan																					2011	7	24	Hisanori Kohtsuka	Masanori Okanishi
		Op-564	2				Amphiuridae	Amphiura	euopla	H. L. Clark	1911	1	West of Jogashima, Misaki, Miura, Kanagawa, Japan	35	07	538	N	139	33	058	E	35	08	179	N	139	32	353	E	316	264		St. 1	2010	6	2	Hisanori Kohtsuka	Masanori Okanishi
		Op-612		2418			Amphiuridae	Amphiura	euopla	H. L. Clark	1911	1	West of Jogashima, Misaki, Miura, Kanagawa, Japan	35	07	4440	N	139	34	2956	E	35	07	6496	N	139	34	0829	E	200	106	R/V Rinkai-Maru	St. 1	2016	9	27	Hisanori Kohtsuka	Masanori Okanishi
		Op-624		140220St.4	1		Amphiuridae	Amphiura	euopla	H. L. Clark	1911	5	Sagami Sea	35	07	840	N	139	34	453	E	35	07	545	N	139	34	338	E	93.6	100	R/V Rinkai-Maru	St. 4	2014	2	20	Hisanori Kohtsuka	Masanori Okanishi
		Op-644		1344	2		Amphiuridae	Amphiura	euopla	H. L. Clark	1911	1	West of Jogashima, Misaki, Miura, Kanagawa, Japan	35	06	2660	N	139	34	0555	E	35	06	4784	N	139	33	6244	E	250	484	R/V Rinkai-Maru	St. 4	2015	5	28	Hisanori Kohtsuka	Masanori Okanishi
		Op-657		1969	3		Amphiuridae	Amphiura	euopla	H. L. Clark	1911	4	West of Jogashima, Misaki, Miura, Kanagawa, Japan	35	08	857	N	139	34	633	E	35	08	720	N	139	34	436	E	83.5	89.3	R/V Rinkai-Maru	St. 2	2016	4	5	Hisanori Kohtsuka	Masanori Okanishi
		Op-669		130724	2		Amphiuridae	Amphiura	euopla	H. L. Clark	1911	1	Sagami Sea	35	08	913	N	139	34	268	E	35	08	993	N	139	34	809	E	85	84.1	R/V Rinkai-Maru		2013	7	24	Hisanori Kohtsuka	Masanori Okanishi
		Op-683		2850	1		Amphiuridae	Amphiura	euopla	H. L. Clark	1911	11	Moroiso Inlet, Miura, Kanagawa, Japan	35	09	395	N	139	36	195	E	35	09	440	N	139	36	205	E	4.1	5.5		St. 2	2017	7	12	Hisanori Kohtsuka	Masanori Okanishi
		Op-694		1075	1	1	Amphiuridae	Amphiura	euopla	H. L. Clark	1911	3	West of Jogashima, Misaki, Miura, Kanagawa, Japan	35	08	5147	N	139	34	8157	E	35	08	1108	N	139	34	8027	E	80.7	85.7	R/V Rinkai-Maru	St. 3	2015	3	9	Hisanori Kohtsuka	Masanori Okanishi
		Op-707		960	1		Amphiuridae	Amphiura	euopla	H. L. Clark	1911	1	Off Jogashima, Misaki, Miura, Kanagawa, Japan	35	08	5591	N	139	32	7390	E	35	08	4585	N	139	32	2040	E	133	274	R/V Rinkai-Maru	St. 2	2015	2	12	Hisanori Kohtsuka	Masanori Okanishi
		Op-736		MO-2021-7			Amphiuridae	Amphiura	euopla	H. L. Clark	1911	6	Off Jogashima, Misaki, Miura, Kanagawa, Japan	35	08	780	N	139	34	774	E	35	09	64	N	139	34	348	E	80-89.8		R/V Rinkai-Maru	St. 3	2018	5	23	Hisanori Kohtsuka	Masanori Okanishi
		Op-824		140123St.3	3		Amphiuridae	Amphiura	euopla	H. L. Clark	1911	1	Sagami Sea	35	09	305	N	139	35	208	E	35	09	481	N	139	35	151	E	72	75.9	R/V Rinkai-Maru	St. 3	2014	1	23	Hisanori Kohtsuka	Masanori Okanishi
		Op-839		121219	1		Amphiuridae	Amphiura	euopla	H. L. Clark	1911	2	Off Jogashima, Misaki, Miura, Kanagawa, Japan	35	08	316	N	139	35	107	E	35	08	157	N	139	35	097	E	80	80	R/V Rinkai-Maru	St. 1	2012	12	19	Hisanori Kohtsuka	Masanori Okanishi
		Op-870		3229	1	1	Amphiuridae	Amphiura	euopla	H. L. Clark	1911	7	West of Jogashima, Misaki, Miura, Kanagawa, Japan	35	09	0033	N	139	55	0001	E	35	08	6171	N	139	34	8529	E	75.9	79.7	R/V Rinkai-Maru	St. 5	2018	2	22	Hisanori Kohtsuka	Masanori Okanishi
		Op-892		140219St.2	4		Amphiuridae	Amphiura	euopla	H. L. Clark	1911	1	Sagami Sea	35	06	086	N	139	34	232	E	35	05	862	N	139	34	089	E	238	291	R/V Rinkai-Maru	St. 2	2014	2	19	Hisanori Kohtsuka	Masanori Okanishi
		Op-894		2535	2		Amphiuridae	Amphiura	euopla	H. L. Clark	1911	3	Aburatsubo, Misaki, Miura, Kanagawa, Japan																	2.8	3.5			2016	11	10	Hisanori Kohtsuka	Masanori Okanishi
		Op-897		2391			Amphiuridae	Amphiura	euopla	H. L. Clark	1911	1	Moroiso Inlet, Misaki, Miura, Japan																					2016	-	-	Hisanori Kohtsuka	Masanori Okanishi
		Op-948		121024St.1	1	1	Amphiuridae	Amphiura	euopla	H. L. Clark	1911	13	Goronba, Off Misaki, Miura, Kanagawa, Japan	35	11	193	N	139	34	758	E	35	10	845	N	139	34	453	E	79	97		St.1	2012	10	24	Hisanori Kohtsuka	Masanori Okanishi
		Op-952		121024St.2	2		Amphiuridae	Amphiura	euopla	H. L. Clark	1911	1	West of Jogashima, Misaki, Miura, Kanagawa, Japan	35	07	814	N	139	34	410	E	35	07	492	N	139	34	357	E	95	98		St.2	2012	10	24	Hisanori Kohtsuka	Masanori Okanishi
		Op-957		130725	1		Amphiuridae	Amphiura	euopla	H. L. Clark	1911		Off Jogashima, Misaki, Miura, Kanagawa, Japan	35	08	379	N	139	34	692	E	35	08	471	N	139	34	389	E	87.3	90.5			2013	7	25	Hisanori Kohtsuka	Masanori Okanishi
		Op-963		140219St.1	5	1	Amphiuridae	Amphiura	euopla	H. L. Clark	1911	1	Off Jogashima, Misaki, Miura, Kanagawa, Japan	35	08	471	N	139	34	748	E	35	08	191	N	139	34	644	E	85	89.1	R/V Rinkai-Maru	St. 1	2014	2	19	Hisanori Kohtsuka	Masanori Okanishi
				MO-19			Amphiuridae	Amphiura	euopla	H. L. Clark	1911	1	Entrance of Koajiro Inlet, Miura, Kanagawa, Japan	35	09	450	N	139	36	570	E									4.5	5.5		St.3	2015	1	19	Hisanori Kohtsuka	Masanori Okanishi
				MO-2021-6			Amphiuridae	Amphiura	euopla	H. L. Clark	1911	1	Off Jogashima, Misaki, Miura, Kanagawa, Japan	35	08	780	N	139	34	774	E	35	09	64	N	139	34	348	E	80-89.8		R/V Rinkai-Maru	St. 3	2018	5	23	Hisanori Kohtsuka	Masanori Okanishi
				MO-2021-60			Amphiuridae	Amphiura	euopla	H. L. Clark	1911	4	Sagami Sea	34	36	950	N	139	15	807	E	34	36	704	N	139	16	367	E	316	328	R/V Tansei	L-3-300	2007	11	27	Masanori Okanishi	Masanori Okanishi
				1344	3		Amphiuridae	Amphiura	iridoides	Matsumoto	1917	1	West of Jogashima, Misaki, Miura, Kanagawa, Japan	35	06	2660	N	139	34	0555	E	35	06	4784	N	139	33	6244	E	250	484	R/V Rinkai-Maru	St. 4	2015	5	28	Hisanori Kohtsuka	Masanori Okanishi
		Op-673		2669	3		Amphiuridae	Amphiura	iridoides	Matsumoto	1917	4	Sagami Sea																			R/V Shinyo	St. 4	2016	10	29	Hisanori Kohtsuka	Masanori Okanishi
		Op-715		369			Amphiuridae	Amphiura	iridoides	Matsumoto	1917	1	Off Jogashima, Misaki, Miura, Kanagawa, Japan	35	08	102	N	139	34	049	E	35	08	378	N	139	33	771	E	94.7	97.3	R/V Rinkai-Maru	St. 1	2014	4	16	Hisanori Kohtsuka	Masanori Okanishi
		Op-738		2766	3	2	Amphiuridae	Amphiura	iridoides	Matsumoto	1917	1	West of Jogashima, Misaki, Miura, Kanagawa, Japan	35	06	9342	N	139	33	5569	E	35	06	6013	N	139	33	1174	E	440	541	R/V Rinkai-Maru	St. 6	2017	2	16	Hisanori Kohtsuka	Masanori Okanishi
		Op-950		121024St.1	1	3	Amphiuridae	Amphiura	iridoides	Matsumoto	1917	1	Goronba, Off Misaki, Miura, Kanagawa, Japan	35	11	193	N	139	34	758	E	35	10	845	N	139	34	453	E	79	97		St.1	2012	10	24	Hisanori Kohtsuka	Masanori Okanishi
		Op-964		140219St.1	5	2	Amphiuridae	Amphiura	iridoides	Matsumoto	1917	6	Off Jogashima, Misaki, Miura, Kanagawa, Japan	35	08	471	N	139	34	748	E	35	08	191	N	139	34	644	E	85	89.1	R/V Rinkai-Maru	St. 1	2014	2	19	Hisanori Kohtsuka	Masanori Okanishi
		Op-1072		121024St.2	7		Amphiuridae	Amphiura	iridoides	Matsumoto	1917	2	West of Jogashima, Misaki, Miura, Kanagawa, Japan	35	07	814	N	139	34	410	E	35	07	492	N	139	34	357	E	95	98		St. 2	2012	10	24	Hisanori Kohtsuka	Masanori Okanishi
				MO-2021-55			Amphiuridae	Amphiura	iridoides	H.L. Clark	1911	10	Sagami Sea	35	03	965	N	139	34	934	E	35	04	268	N	139	34	957	E	604	407	R/V Tansei	L-2'-600	2007	11	28	Masanori Okanishi	Masanori Okanishi
				1881	1	1	Amphiuridae	Amphiura	koreae	Duncan	1878	7	West of Jogashima, Misaki, Miura, Kanagawa, Japan	35	06	9490	N	139	33	7381	E	35	06	7231	N	139	34	0574	E	398	230	R/V Rinkai-Maru	St. 5	2015	12	10	Hisanori Kohtsuka	Masanori Okanishi
				3185	2		Amphiuridae	Amphiura	koreae	Duncan	1878	2	West of Jogashima, Misaki, Miura, Kanagawa, Japan	35	07	1136	N	139	33	2577	E	35	06	6949	N	139	33	2577	E	440	445	R/V Rinkai-Maru	St. 1	2018	2	22	Hisanori Kohtsuka	Masanori Okanishi
		Op-501					Amphiuridae	Amphiura	koreae	Duncan	1879	1	Off Jogashima, Misaki, Miura, Kanagawa, Japan																	80				2011	10	27	Hisanori Kohtsuka	Masanori Okanishi
		Op-568	2				Amphiuridae	Amphiura	koreae	Duncan	1879	4	West of Jogashima, Misaki, Miura, Kanagawa, Japan																					2010	6	24	Hisanori Kohtsuka	Masanori Okanishi
		Op-705		1450			Amphiuridae	Amphiura	koreae	Duncan	1878	1	South west of Jogashima, Misaki, Miura, Kanagawa, Japan	35	04	4957	N	139	33	6146	E	35	03	9024	N	139	33	6466	E	692	770	R/V Rinkai-Maru	St. 1	2015	6	24	Hisanori Kohtsuka	Masanori Okanishi
		Op-746		2766	3	3	Amphiuridae	Amphiura	koreae	Duncan	1878	1	West of Jogashima, Misaki, Miura, Kanagawa, Japan	35	06	9342	N	139	33	5569	E	35	06	6013	N	139	33	1174	E	440	541	R/V Rinkai-Maru	St. 6	2017	2	16	Hisanori Kohtsuka	Masanori Okanishi
		Op-876		140220St.5	2	2	Amphiuridae	Amphiura	koreae	Duncan	1879	1	Off Jogashima, Misaki, Miura, Kanagawa, Japan	35	04	111	N	139	33	761	E	35	03	693	N	139	33	293	E	666	796	R/V Rinkai-Maru	St. 5	2014	2	20	Hisanori Kohtsuka	Masanori Okanishi
		Op-942		140220St.5	4		Amphiuridae	Amphiura	koreae	Duncan	1879	1	Off Jogashima, Misaki, Miura, Kanagawa, Japan	35	07	840	N	139	34	453	E	35	07	545	N	139	34	338	E	666	796	R/V Rinkai-Maru	St. 4	2014	2	20	Hisanori Kohtsuka	Masanori Okanishi
				MO-2021-32			Amphiuridae	Amphiura	koreae	Duncan	1878	1	Sagami Sea	35	04	581	N	139	34	039	E	35	04	549	N	139	34	792	E	535	338	R/V Tansei	L-2-500	2007	11	25	Masanori Okanishi	Masanori Okanishi
				MO-2021-43			Amphiuridae	Amphiura	koreae	Duncan	1878	2	Sagami Sea	35	03	045	N	139	12	275	E	35	02	819	N	139	12	006	E	510	255	R/V Tansei	L-1-500	2007	11	25	Masanori Okanishi	Masanori Okanishi
				MO-2021-56			Amphiuridae	Amphiura	koreae	Duncan	1878	5	Sagami Sea	35	03	965	N	139	34	934	E	35	04	268	N	139	34	957	E	604	407	R/V Tansei	L-2'-600	2007	11	28	Masanori Okanishi	Masanori Okanishi
				598	2		Amphiuridae	Amphiura	micraspis	H. L. Clark	1911	3	Off Jogashima, Misaki, Miura, Kanagawa, Japan	35	08	359	N	139	34	753	E	35	08	649	N	139	34	328	E	85.5	91.4	R/V Rinkai-Maru	St. 1	2014	7	28	Hisanori Kohtsuka	Masanori Okanishi
		Op-488	1				Amphiuridae	Amphiura	micraspis	H. L. Clark	1911	4	Off Jogashima, Misaki, Miura, Kanagawa, Japan																				１回目	2011	10	24	Hisanori Kohtsuka	Masanori Okanishi
		Op-749		1075	1	4	Amphiuridae	Amphiura	micraspis	H. L. Clark	1911	2	West of Jogashima, Misaki, Miura, Kanagawa, Japan	35	08	5147	N	139	34	8157	E	35	08	1108	N	139	34	8027	E	80.7	85.7	R/V Rinkai-Maru	St. 3	2015	3	9	Hisanori Kohtsuka	Masanori Okanishi
				1075	3		Amphiuridae	Amphiura	microdiscus	Duncan	1879	1	West of Jogashima, Misaki, Miura, Kanagawa, Japan	35	08	5147	N	139	34	8157	E	35	08	1108	N	139	34	8027	E	80.7	85.7	R/V Rinkai-Maru	St. 3	2015	3	9	Hisanori Kohtsuka	Masanori Okanishi
				F-1276			Amphiuridae	Amphiura	profundi	Lütke & Mortensen	1899	1	West of Amami-Oshima, Kagoshima, Japan	28	33	885	N	127	02	622	E	28	32	955	N	127	02	196	E	610	611			2012	11	16	Hisanori Kohtsuka	Masanori Okanishi
				MO-2021-57			Amphiuridae	Amphioplus	rhadinobrachius	H. L. Clark	1911	1	Sagami Sea	35	03	965	N	139	34	934	E	35	04	268	N	139	34	957	E	604	407	R/V Tansei	L-2'-600	2007	11	28	Masanori Okanishi	Masanori Okanishi
		Op-466	1				Amphiuridae	Amphiura	trachydisca	H. L. Clark	1911	3	Off Jogashima, Misaki, Miura, Kanagawa, Japan																	80	80			2011	5	19		Masanori Okanishi
		Op-931		120113St.2	2	1	Amphiuridae	Amphiura	trachydisca	H. L. Clark	1911	14	West of Jogashima, Misaki, Miura, Kanagawa, Japan	35	06	041	N	139	34	049	E	35	06	303	N	139	34	465	E	364	158	R/V Rinkai-Maru	St.2	2012	1	13	Hisanori Kohtsuka	Masanori Okanishi
				MO-21			Amphiuridae	Amphiura	trachydisca	H. L. Clark	1911	1	West of Jogashima, Misaki, Miura, Kanagawa, Japan	35	07	035		139	34	011		35	06	724	N	139	33	685	E	297	448	R/V Rinkai-Maru	St.2	2015	1	20	Hisanori Kohtsuka	Masanori Okanishi
				MO-2021-54			Amphiuridae	Amphiura	trachydisca	H. L. Clark	1911	1	Sagami Sea	35	02	831	N	139	12	068	E	35	02	486	N	139	11	897	E	280	116	R/V Tansei	L-1-200	2007	11	25	Masanori Okanishi	Masanori Okanishi
				3257			Amphiuridae	Amphiura	vadicola	Matsumoto	1915	1	Aburatsubo Bay, Kanagawa, Japan	35	09	538	N	139	37	001	E	35	09	593	N	139	36	913	E	2	2		St. 1	2018	3	15	Hisanori Kohtsuka	Masanori Okanishi
		Op-431					Amphiuridae	Amphiura	vadicola	Matsumoto	1915	2	Araihama, Misaki, Miura, Miura, Kanagawa, Japan																	3.8	3.8			2009	12	15	Hisanori Kohtsuka	Masanori Okanishi
		Op-472					Amphiuridae	Amphiura	vadicola	Matsumoto	1915	1	Off Koajiro Inlet, Miura, Kanagawa, Japan																	15	15			2011	6	14	Hisanori Kohtsuka	Masanori Okanishi
		Op-645		2872			Amphiuridae	Amphiura	vadicola	Matsumoto	1915	5	Moroiso Inlet, Miura, Kanagawa, Japan																	6	6			2017	7	25	Hisanori Kohtsuka	Masanori Okanishi
		Op-752		2448			Amphiuridae	Amphiura	vadicola	Matsumoto	1915	1	Entrance of Koajiro Inlet, Miura, Kanagawa, Japan																					2016	9	28	Hisanori Kohtsuka	Masanori Okanishi
		Op-777		2001			Amphiuridae	Amphiura	vadicola	Matsumoto	1915	1	Inide of Nagai Port, Miura, Kanagawa, Jpan																	5	5		St. 1 （A)	2016	2	2	Hisanori Kohtsuka	Masanori Okanishi
		Op-792		1642	2		Amphiuridae	Amphiura	vadicola	Matsumoto	1915	2	West of Jogashima, Misaki, Miura, Kanagawa, Japan	35	09	079	N	139	34	880	E	35	09	162	N	139	34	911	E	78.3	77.2	R/V Rinkai-Maru	St. 1	2015	7	31	Hisanori Kohtsuka	Masanori Okanishi
		Op-1042		130313	4		Amphiuridae	Amphiura	vadicola	Matsumoto	1915	1	Entrance of Moroiso Inlet, Miura, Kanagawa, Japan																	1	2.2			2013	3	13	Hisanori Kohtsuka	Masanori Okanishi
NSMT	13969			3019	1		Amphiuridae	Ophiocentrus	sp.			1	Off Jogashima, Misaki, Miura, Kanagawa, Japan																			R/V Shinyo		2017	10	27	Hisanori Kohtsuka	Masanori Okanishi
		Op-477					Amphiuridae	Ophiocentrus	verticillatus	Döderlein	1896	5	West of Jogashima, Misaki, Miura, Kanagawa, Japan																					2011	6	30	Hisanori Kohtsuka	Masanori Okanishi
		Op-519-3		Op-519	3		Amphiuridae	Ophiocentrus	verticillatus	Döderlein	1896	1	West of Jogashima, Misaki, Miura, Kanagawa, Japan	35	07	301	N	139	33	365	E	35	07	327	N	139	32	978	E	300	493		St. 2	2012	2	24	Hisanori Kohtsuka	Masanori Okanishi
		Op-559	2				Amphiuridae	Ophiocentrus	verticillatus	Döderlein	1896	1	West of Jogashima, Misaki, Miura, Kanagawa, Japan	35	07	538	N	139	33	058	E	35	08	179	N	139	32	353	E	316	264		St.1	2010	6	2	Hisanori Kohtsuka	Masanori Okanishi
		Op-668		3019	3		Amphiuridae	Ophiocentrus	verticillatus	Döderlein	1896	1	Off Jogashima, Misaki, Miura, Kanagawa, Japan																			R/V Shinyo		2017	10	27	Hisanori Kohtsuka	Masanori Okanishi
		Op-731		2059	2		Amphiuridae	Ophiocentrus	verticillatus	Döderlein	1896	1	West of Jogashima, Misaki, Miura, Kanagawa, Japan	35	07	544	N	139	34	256	E	35	07	264	N	139	34	110	E	110	256	R/V Rinkai-Maru	St. 1	2016	4	14	Hisanori Kohtsuka	Masanori Okanishi
		Op-857		1174	1		Amphiuridae	Ophiocentrus	verticillatus	Döderlein	1896	2	Entrance of Koajiro Inlet, Miura, Kanagawa, Japan	35	10	050	N	139	36	400	E									20	20		St. 3	2015	4	9	Hisanori Kohtsuka	Masanori Okanishi
		Op-959		130725			Amphiuridae	Ophiocentrus	verticillatus	Döderlein	1896	1	Off Jogashima, Misaki, Miura, Kanagawa, Japan	35	08	379	N	139	34	692	E	35	08	471	N	139	34	389	E	87.3	90.5			2013	7	25	Hisanori Kohtsuka	Masanori Okanishi
		Op-1026		3229	5		Amphiuridae	Ophiocentrus	verticillatus	Döderlein	1896	2	West of Jogashima, Misaki, Miura, Kanagawa, Japan	35	09	0033	N	139	55	0001	E	35	08	6171	N	139	34	8529	E	75.9	79.7	R/V Rinkai-Maru	St. 5	2018	2	22	Hisanori Kohtsuka	Masanori Okanishi
		Op427			1		Gorgonocephalidae	Astrocladus	dofleini	Döderlein	1910	1	Off Jogashima, Misaki, Miura, Kanagawa, Japan																	50	50			2010	3	2	Hisanori Kohtsuka	Masanori Okanishi
		Op-578		MO-2021-30			Gorgonocephalidae	Astrocladus	dofleini	Döderlein	1911	1	Koajiro Bay, Kanagawa, Japan																					-	-	-	Hisanori Kohtsuka	Masanori Okanishi
		Op-695		767			Gorgonocephalidae	Astrocladus	dofleini	Döderlein	1902	3	Araihama, Misaki, Kanagawa, Japan																	0.2	0.2			2014	10	24	Hisanori Kohtsuka	Masanori Okanishi
		Op-1000		140908			Gorgonocephalidae	Astrocladus	dofleini	Döderlein	1911	1	Water intank at Araihama, Misaki, Miura, Kanagawa, Japan																	2-3				2014	9	8	Hisanori Kohtsuka	Masanori Okanishi
				MO-2020-07			Gorgonocephalidae	Astrocladus	dofleini	Döderlein	1911	1	Koajiro Bay, Kanagawa, Japan																	15				2018	6		Hisanori Kohtsuka	Masanori Okanishi
NSMT	13845	Op-582		120419St.1	2		Hemieuryalidae	Ophiozonella	longispina	H.L.Clark	1908	1	West of Jogashima, Misaki, Miura, Kanagawa, Japan	35	07	734	N	139	34	133	E	35	07	714	N	139	33	819	E	98.7			St. 1	2012	4	19	Hisanori Kohtsuka	Masanori Okanishi
NSMT	13883	Op-636		3342	3		Hemieuryalidae	Ophiozonella	projecta	Koehler	1905	3	West of Jogashima, Misaki, Miura, Kanagawa, Japan	35	08	3986	N	139	32	9517	E	35	08	3244	N	139	32	6062	E	108	187	R/V Rinkai-Maru	St. 2	2018	4	17	Hisanori Kohtsuka	Masanori Okanishi
NSMT	13883	Op-636		3342	3		Hemieuryalidae	Ophiozonella	projecta	Koehler	1905	3	West of Jogashima, Misaki, Miura, Kanagawa, Japan	35	08	3986	N	139	32	9517	E	35	08	3244	N	139	32	6062	E	108	187	R/V Rinkai-Maru	St. 2	2018	4	17	Hisanori Kohtsuka	Masanori Okanishi
		Op-489					Ophiacanthidae	Ophiacantha	levispina	Lyman	1878	2	Off Jogashima, Misaki, Miura, Kanagawa, Japan																					2011	10	24	Hisanori Kohtsuka	Masanori Okanishi
		Op-581		3303	1		Ophiacanthidae	Ophiacantha	levispina	Lyman	1878	5	West of Jogashima, Misaki, Miura, Kanagawa, Japan	35	8	494	N	139	34	564	E	35	08	653	N	139	34	212	E	86.6	90.7	R/V Rinkai-Maru	St. 3	2018	4	5	Hisanori Kohtsuka	Masanori Okanishi
		Op-648		3342	2		Ophiacanthidae	Ophiacantha	levispina	Lyman	1878	6	West of Jogashima, Misaki, Miura, Kanagawa, Japan	35	08	3986	N	139	32	9517	E	35	08	3281	N	139	32	5683	E	108	198	R/V Rinkai-Maru	St. 2	2018	4	17	Hisanori Kohtsuka	Masanori Okanishi
		Op-649		2741	3		Ophiacanthidae	Ophiacantha	levispina	Lyman	1878	4	West of Jogashima, Misaki, Miura, Kanagawa, Japan	35	08	398	N	139	32	875	E	35	08	096	N	139	32	854	E	112	143	R/V Rinkai-Maru	St. 4	2017	2	15	Hisanori Kohtsuka	Masanori Okanishi
		Op-670		2560	2		Ophiacanthidae	Ophiacantha	levispina	Lyman	1878	1	West of Jogashima, Misaki, Miura, Kanagawa, Japan	35	07	680	N	139	34	337	E	35	07	338	N	139	34	299	E	96.2	200	R/V Rinkai-Maru	St. 2	2016	11	16	Hisanori Kohtsuka	Masanori Okanishi
		Op-690		1287	2		Ophiacanthidae	Ophiacantha	levispina	Lyman	1878	2	West of Jogashima, Misaki, Miura, Kanagawa, Japan	35	8	577	N	139	32	681	E	35	08	615	N	139	32	474	E	153	232	R/V Rinkai-Maru	St. 1	2015	05	21	Hisanori Kohtsuka	Masanori Okanishi
		Op-698		1741	1		Ophiacanthidae	Ophiacantha	levispina	Lyman	1878	1	Sagami Sea, Eastern Japan	35	6	288	N	139	33	468	E	35	6	468	N	139	32	34.8	E	476			st.2(T4)	2015	10	31	Hisanori Kohtsuka	Masanori Okanishi
		Op-701		130625ドレッジ	1		Ophiacanthidae	Ophiacantha	levispina	Lyman	1878	2	West of Jogashima, Misaki, Miura, Kanagawa, Japan	35	07	765	N	139	33	309	E	35	08	078	N	139	33	328	E	105	100	R/V Rinkai-Maru		2013	6	25	Hisanori Kohtsuka	Masanori Okanishi
NSMT	13985	Op-735		MO-2021-9			Ophiacanthidae	Ophiacantha	levispina	Lyman	1878	6	Off Jogashima, Misaki, Miura, Kanagawa, Japan	35	07	054	N	139	33	990	E	35	07	64	N	139	33	662	E	384	478	R/V Rinkai-Maru	St. 3	2020	7	30	Masanori Okanishi	Masanori Okanishi
NSMT	13985	Op-735		MO-2021-9			Ophiacanthidae	Ophiacantha	levispina	Lyman	1878	6	Off Jogashima, Misaki, Miura, Kanagawa, Japan	35	07	054	N	139	33	990	E	35	07	64	N	139	33	662	E	384	478	R/V Rinkai-Maru	St. 3	2020	7	30	Masanori Okanishi	Masanori Okanishi
		Op-778		3318	2		Ophiacanthidae	Ophiacantha	levispina	Lyman	1878	1	West of Jogashima, Misaki, Miura, Kanagawa, Japan	35	8	7801	N	139	34	3530	E	35	08	7100	N	139	34	0063	E	89	91.8	R/V Rinkai-Maru	St. 1	2018	04	17	Hisanori Kohtsuka	Masanori Okanishi
		Op-782		120419St.2	2		Ophiacanthidae	Ophiacantha	levispina	Lyman	1878	1	West of Jogashima, Misaki, Miura, Kanagawa, Japan	35	07	810	N	139	34	072	E	35	07	814	N	139	33	814	E	97.3	100	R/V Rinkai-Maru	St. 2	2012	4	19+AY1664:AY1664	Hisanori Kohtsuka	Masanori Okanishi
		Op-833		130617St.3	5		Ophiacanthidae	Ophiacantha	levispina	Lyman	1878	1	West of Jogashima, Misaki, Miura, Kanagawa, Japan	35	06	251	N	139	34	442	E	35	06	613	N	139	33	850	E	147	335	R/V Rinkai-Maru	St. 3	2013	6	17	Hisanori Kohtsuka	Masanori Okanishi
		Op-847		120419St.1	4		Ophiacanthidae	Ophiacantha	levispina	Lyman	1878	3	Off Jogashima, Misaki, Miura, Kanagawa, Japan	35	08	471	N	139	34	748	E	35	08	191	N	139	34	644	E	85	89.1	R/V Rinkai-Maru	St. 1	2014	2	19	Hisanori Kohtsuka	Masanori Okanishi
		Op-869		131114	2		Ophiacanthidae	Ophiacantha	levispina	Lyman	1878	2	Okinose, Sagami Sea																	300	300			2013	11	14	Hisanori Kohtsuka	Masanori Okanishi
				MO-2021-31			Ophiacanthidae	Ophiacantha	levispina	Lyman	1878	18	Sagami Sea	35	05	679	N	139	35	446	E	35	05	661	N	139	35	653	E	113	104	R/V Tansei	L-2-100	2007	11	25	Masanori Okanishi	Masanori Okanishi
				MO-2021-33			Ophiacanthidae	Ophiacantha	levispina	Lyman	1878	8	Sagami Sea	34	34	043	N	139	18	373	E	34	33	561	N	139	17	806	E	198	152	R/V Tansei	L-3-200	2007	11	27	Masanori Okanishi	Masanori Okanishi
				MO-2021-35			Ophiacanthidae	Ophiacantha	levispina	Lyman	1878	1	Sagami Sea	35	04	406	N	139	35	539	E	35	04	444	N	139	35	310	E	326	321	R/V Tansei	L-2'-350	2007	11	28	Masanori Okanishi	Masanori Okanishi
				MO-2021-38			Ophiacanthidae	Ophiacantha	levispina	Lyman	1878	24	Sagami Sea	34	33	110	N	139	17	418	E	34	33	651	N	139	17	674	E	143	143	R/V Tansei	L-3-100	2007	11	27	Masanori Okanishi	Masanori Okanishi
				MO-2021-42			Ophiacanthidae	Ophiacantha	levispina	Lyman	1878	9	Sagami Sea	35	04	792	N	139	35	272	E	35	04	863	N	139	35	122	E	223	221	R/V Tansei	L-2'-200	2007	11	28	Masanori Okanishi	Masanori Okanishi
				MO-2021-49			Ophiacanthidae	Ophiacantha	levispina	Lyman	1878	1	Sagami Sea	35	05	679	N	139	35	446	E	35	05	661	N	139	35	653	E	113	104	R/V Tansei	L-2-100	2007	11	25	Masanori Okanishi	Masanori Okanishi
				MO-2021-53			Ophiacanthidae	Ophiacantha	levispina	Lyman	1878	9	Sagami Sea	35	03	045	N	139	12	275	E	35	02	819	N	139	12	006	E	510	255	R/V Tansei	L-1-500	2007	11	25	Masanori Okanishi	Masanori Okanishi
		Op-514	2				Ophiacanthidae	Ophiacantha	rhachophora	H. L. Clark	1911	1	Off Jogashima, Misaki, Miura, Kanagawa, Japan	35	07	301	N	139	33	365	E	35	07	327	N	139	32	978	E	300	493		St. 1	2012	2	24	Hisanori Kohtsuka	Masanori Okanishi
		Op-1035		120113St.2	5		Ophiacanthidae	Ophiacantha	rhachophora	H. L. Clark	1911	6	Off Jogashima, Misaki, Miura, Kanagawa, Japan	35	06	041	N	139	34	049	E	35	06	303	N	139	34	465	E	364	158	R/V Rinkai-Maru	St.2	2012	1	13	Hisanori Kohtsuka	Masanori Okanishi
NSMT	13987			MO-2021-51			Ophiacanthidae	Ophiacantha	stellifera	Matsumoto	1917	1	Sagami Sea	34	39	889	N	139	12	191	E	34	40	030	N	139	13	866	E	551	504	R/V Tansei	L-3-500	2007	11	27	Masanori Okanishi	Masanori Okanishi
		Op-859		131114	1		Ophiacanthidae	Ophiacantha	stellifera	Matsumoto	1917	7	Okinose, Sagami Sea																	300	300			2013	11	14	Hisanori Kohtsuka	Masanori Okanishi
NSMT	13973			1577	1		Ophiactidae	Ophiactis	dyscrita	H. L. Clark	1911	1	West of Jogashima, Misaki, Miura, Kanagawa, Japan	35	07	239	N	139	33	522	E	35	07	389	N	139	33	209	E	267	309	R/V Rinkai-Maru	St. 3	2014	10	20	Hisanori Kohtsuka	Masanori Okanishi
NSMT	13974	Op-834		3039	3		Ophiactidae	Ophiactis	macrolepidota	Marktanner	1887	1	Off Tateyama, Chiba, Japan	34	58	559	N	139	46	388	E									30	30	T/V Sagitta VI	St. 1	2017	11	22	Hisanori Kohtsuka	Masanori Okanishi
		Op-745		1217			Ophiactidae	Ophiactis	profundi	Muller & Troschel	1842	1	West of Jogashima, Misaki, Miura, Kanagawa, Japan	35	08	428	N	139	33	406	E	35	08	380	N	139	32	970	E	99	108	R/V Rinkai-Maru	St. 2	2015	4	22	Hisanori Kohtsuka	Masanori Okanishi
		Op-708		313			Ophiactidae	Ophiactis	savignyi	Müller & Troschell	1842	3	Water intank at Araihama, Misaki, Miura, Kanagawa, Japan																					2014	5	27	Hisanori Kohtsuka	Masanori Okanishi
		Op-712		252			Ophiactidae	Ophiactis	savignyi	Müller & Troschell	1842	1	Entrance of Moroiso Inlet	35	09	33.775	N	139	36	21.916	E	35	09	32.36	N	139	36	25.700	E	5	6			2014	3	4	Hisanori Kohtsuka	Masanori Okanishi
		Op-770		3063			Ophiactidae	Ophiactis	savignyi	Müller & Troschell	1842	1	Off Tateyama, Chiba, Japan	34	59	222	N	139	46	334	E											T/V Sagitta VI	St. 3	2017	11	22	Hisanori Kohtsuka	Masanori Okanishi
		Op-794		463	2		Ophiactidae	Ophiactis	savignyi	Müller & Troschell	1842	1	Araihama, Misaki, Kanagawa, Japan																	2	3			2014	6	26	Hisanori Kohtsuka	Masanori Okanishi
		Op-758		1744	2		Ophiactidae	Ophiactis	profundi	Müller & Troschell	1842	1	Off Jogashima, Misaki, Miura, Kanagawa, Japan	35	05	348	N	139	35	312	E	35	05	384	N	139	36	144	E	106	106	R/V Shinyo	St. 5	2015	11	1	Hisanori Kohtsuka	Masanori Okanishi
NSMT	13976	Op-788		1571	1		Ophiactidae	Ophiactis	profundi	Müller & Troschell	1842	1	West of Jogashima, Misaki, Miura, Kanagawa, Japan	35	07	239	N	139	33	522	E	35	07	389	N	139	33	209	E	267	309	R/V Rinkai-Maru	St. 3	2014	10	20	Hisanori Kohtsuka	Masanori Okanishi
NSMT	13972			MO-2021-46			Ophiactis	Ophiactis	brachygenys	H. L. Clark	1911	1	Sagami Sea	34	39	889	N	139	12	191	E	34	40	030	N	139	13	866	E	551	504	R/V Tansei	L-3-500	2007	11	27	Masanori Okanishi	Masanori Okanishi
		Op-487					Ophiaoactidae	Ophiactis	macrolepidota	Marktanner	1887	1	Off Jogashima, Misaki, Miura, Kanagawa, Japan																				１回目	2011	10	24	Hisanori Kohtsuka	Masanori Okanishi
				120419St.1	4	2	Ophiaoactidae	Ophiactis	profundi	Müller & Troschel	1842	1	West of Jogashima, Misaki, Miura, Kanagawa, Japan	35	07	734	N	139	34	133	E	35	07	714	N	139	33	819	E	98.7			St. 1	2012	4	19	Hisanori Kohtsuka	Masanori Okanishi
		Op-564	1				Ophiaoactidae	Ophiactis	profundi	Müller & Troschel	1842	1	West of Jogashima, Misaki, Miura, Kanagawa, Japan	35	07	538	N	139	33	058	E	35	08	179	N	139	32	353	E	316	264		St. 1	2010	6	2	Hisanori Kohtsuka	Masanori Okanishi
		Op-565					Ophiaoactidae	Ophiactis	profundi	Müller & Troschel	1842	2	West of Jogashima, Misaki, Miura, Kanagawa, Japan	35	07	538	N	139	33	058	E	35	08	179	N	139	32	353	E	316	264		St. 1	2010	6	2	Hisanori Kohtsuka	Masanori Okanishi
		Op-843		140219St.1	3		Ophiaoactidae	Ophiactis	profundi	Müller & Troschel	1842	3	Off Jogashima, Misaki, Miura, Kanagawa, Japan	35	08	471	N	139	34	748	E	35	08	191	N	139	34	644	E	85	89.1	R/V Rinkai-Maru	St. 1	2014	2	19	Hisanori Kohtsuka	Masanori Okanishi
		Op-856		130501St.2	1	1	Ophiaoactidae	Ophiactis	profundi	Müller & Troschel	1842	3	Off Jogashima, Misaki, Miura, Kanagawa, Japan	35	08	957	N	139	34	749	E	35	08	480						88	92	R/V Rinkai-Maru	St. 2	2013	5	1	Hisanori Kohtsuka	Masanori Okanishi
		Op-891		2334			Ophiaoactidae	Ophiactis	profundi	Müller & Troschel	1842	3	West of Jogashima, Misaki, Miura, Kanagawa, Japan	35	08	213	N	139	33	040	E	35	08	529	N	139	32	938	E	106	109	R/V Rinkai-Maru	St. 1	2016	7	7	Hisanori Kohtsuka	Masanori Okanishi
		Op-893		120314St.4	5		Ophiaoactidae	Ophiactis	profundi	Müller & Troschel	1842	1	Sagami Sea																			R/V Rinkai-Maru		2013	3	14	Hisanori Kohtsuka	Masanori Okanishi
		Op-895		120419St.1	8		Ophiaoactidae	Ophiactis	profundi	Müller & Troschel	1842	1	West of Jogashima, Misaki, Miura, Kanagawa, Japan	35	07	734	N	139	34	133	E	35	07	714	N	139	33	819	E	98.7			St. 1	2012	4	19	Hisanori Kohtsuka	Masanori Okanishi
		Op-901		120314St.4	6	1	Ophiaoactidae	Ophiactis	profundi	Müller & Troschel	1842	1	Off Jogashima, Misaki, Miura, Kanagawa, Japan	35	08	156	N	139	34	783	E	35	07	901	N	139	34	806	E	87.5	88.6	R/V Rinkai-Maru	St. 4	2013	3	14	Hisanori Kohtsuka	Masanori Okanishi
		Op-925		131206			Ophiaoactidae	Ophiactis	profundi	Müller & Troschel	1842	6	Sagami Sea																					2013	12	6	Hisanori Kohtsuka	Masanori Okanishi
		Op-961		131031	4		Ophiaoactidae	Ophiactis	profundi	Müller & Troschel	1842		Sagami Sea	35	08	250	N	139	34	732	E	35	08	967	N	139	34	744	E	86.8	88.6			2013	10	31	Hisanori Kohtsuka	Masanori Okanishi
		Op-962		140219St.1	4	2	Ophiaoactidae	Ophiactis	profundi	Müller & Troschel	1842	1	Off Jogashima, Misaki, Miura, Kanagawa, Japan	35	08	471	N	139	34	748	E	35	08	191	N	139	34	644	E	85	89.1	R/V Rinkai-Maru	St. 1	2014	2	19	Hisanori Kohtsuka	Masanori Okanishi
		Op-1043		130617St.5			Ophiaoactidae	Ophiactis	profundi	Müller & Troschel	1842	3	Off Jogashima, Misaki, Miura, Kanagawa, Japan	35	07	864		139	34	369		35	08	188	N	139	34	480	E	95	90		St.5	2013	6	17	Hisanori Kohtsuka	Masanori Okanishi
		Op-1046		100624St.2			Ophiaoactidae	Ophiactis	profundi	Müller & Troschel	1842	1	Off Jogashima, Misaki, Miura, Kanagawa, Japan																				St.2	2010	6	24	Hisanori Kohtsuka	Masanori Okanishi
		Op-460					Ophiaoactidae	Ophiactis	savignyi	Müller & Troschel	1942	1	Moroiso, Misaki, Miura, Kanagawa, Japan																					2011	5	18	Hisanori Kohtsuka	Masanori Okanishi
		Op-542					Ophiaoactidae	Ophiactis	savignyi	Müller & Troschel	1942	2	Araihama, Misaki, Miura, Miura, Kanagawa, Japan																	0	0			2012	7	3	Hisanori Kohtsuka	Masanori Okanishi
		Op-845		1702	1		Ophiaoactidae	Ophiactis	savignyi	Müller & Troschel	1942	2	Entrance of Koajiro Inlet, Miura, Kanagawa, Japan																					2015	10	9	Hisanori Kohtsuka	Masanori Okanishi
		Op-874		140926			Ophiaoactidae	Ophiactis	savignyi	Müller & Troschel	1942	1	Entrance of Koajiro Inlet, Miura, Kanagawa, Japan																	4	5			2014	9	26	Hisanori Kohtsuka	Masanori Okanishi
		Op-888		090819	1		Ophiaoactidae	Ophiactis	savignyi	Müller & Troschel	1942	23	Moroiso, Misaki, Miura, Kanagawa, Japan																					2009	8	19	Hisanori Kohtsuka	Masanori Okanishi
				MO-2021-71			Ophiaoactidae	Ophiactis	savignyi	Müller & Troschel	1942	1	Araihama, Misaki, Miura, Miura, Kanagawa, Japan																					2019	6	12	Toru Miura	Masanori Okanishi
NSMT	13994			MO-2021-23			Ophiocomidae	Ophiocoma	dentata	Muller & Trochel	1842	1	Misaki, Miura, Kanagawa, Japan																					-	-	-	Hisanori Kohtsuka	Masanori Okanishi
		Op-574		MO-2021-4			Ophiocomidae	Ophiocoma	dentata	Muller & Troshcel	1842	4	Araihama, Misaki, Kanagawa, Japan																	2-4				2020	3	26	Hisanori Kohtsuka	Masanori Okanishi
				MO-2020-08			Ophiocomidae	Ophiocoma	dentata	Müller & Troschell	1842	4	Araihama, Misaki, Kanagawa, Japan																	2-4 m				2020	3	26	Hisanori Kohtsuka	Masanori Okanishi
				MO-2020-09			Ophiocomidae	Ophiocoma	dentata	Müller & Troschell	1842	1	Araihama, Misaki, Kanagawa, Japan																	Intertidal zone				2020	3	2	Masanori Okanishi	Masanori Okanishi
NSMT	13848			769			Ophiocomidae	Ophiomastix	mixta	Lütken	1869	1	Moroiso Inlet, Miura, Kanagawa, Japan																	3	3			2014	12	19	Hisanori Kohtsuka	Masanori Okanishi
		Op-504					Ophiocomidae	Ophiomastix	mixta	Lütken	1869	1	Araihama, Misaki, Miura, Miura, Kanagawa, Japan																					2010			Hisanori Kohtsuka	Masanori Okanishi
		Op-535					Ophiocomidae	Ophiomastix	mixta	Lütken	1869	1	Araihama, Misaki, Miura, Miura, Kanagawa, Japan																					2012	6	5	Hisanori Kohtsuka	Masanori Okanishi
				MO-2021-21			Ophiocomidae	Ophiomastix	mixta	Lutken	1869	1	Misaki, Miura, Kanagawa, Japan																					-	-	-	Hisanori Kohtsuka	Masanori Okanishi
		Op425	2				Ophiodermatidae	Ophiarachnella	gorgonia	Müller & Troschel	1842	1	Araihama, Misaki, Miura, Miura, Kanagawa, Japan																	0.3	0.3			2009	8	16	Hisanori Kohtsuka	Masanori Okanishi
		Op-506					Ophiodermatidae	Ophiarachnella	gorgonia	Müller & Troschel	1842	1	Araihama, Misaki, Miura, Miura, Kanagawa, Japan																					2010			Hisanori Kohtsuka	Masanori Okanishi
NSMT	13846	Op-827		MO-2021-67			Ophiodermatidae	Ophiarachnella	gorgonia	Müller & Troschel	1842	3	Moroiso Inlet, Miura, Kanagawa, Japan																	1	1			2019	9	27	Masanori Okanishi	Masanori Okanishi
NSMT	13989			MO-2021-27			Ophiodermatidae	Ophiarachnella	gorgonia	Muller & Trochel	1842	1	Misaki, Miura, Kanagawa, Japan																					-	-	-	Hisanori Kohtsuka	Masanori Okanishi
		Op-827		MO-2021-67			Ophiodermatidae	Ophiarachnella	gorgonia	Müller & Troschel	1842	3	Moroiso Inlet, Miura, Kanagawa, Japan																	1	1			2019	9	27	Masanori Okanishi	Masanori Okanishi
		Op-530					Ophiodermatidae	Ophiopsammus	anchista	H. L. Clark	1911	1	Off Jogashima, Misaki, Miura, Kanagawa, Japan																	80	80			2012	4	10	Hisanori Kohtsuka	Masanori Okanishi
		Op-621		140123St.3			Ophiodermatidae	Ophiopsammus	anchista	H. L. Clark	1911	1	Sagami Sea	35	09	305	N	139	35	208	E	35	09	481	N	139	35	151	E	72	75.9	R/V Rinkai-Maru	St. 3	2014	1	23	Hisanori Kohtsuka	Masanori Okanishi
		Op-664		2071	1		Ophiodermatidae	Ophiopsammus	anchista	H. L. Clark	1911	1	West of Jogashima, Misaki, Miura, Kanagawa, Japan	35	07	646	N	139	34	3193	E	35	07	2726	N	139	34	1232	E	98.2	256	R/V Rinkai-Maru	St. 2	2016	4	14	Hisanori Kohtsuka	Masanori Okanishi
		Op-672		140220St.4	3		Ophiodermatidae	Ophiopsammus	anchista	H. L. Clark	1911	1	Sagami Sea	35	07	840	N	139	34	453	E	35	07	545	N	139	34	338	E	93.6	100	R/V Rinkai-Maru	St. 4	2014	2	20	Hisanori Kohtsuka	Masanori Okanishi
		Op-773		3342	7		Ophiodermatidae	Ophiopsammus	anchista	H. L. Clark	1911	1	West of Jogashima, Misaki, Miura, Kanagawa, Japan	35	08	3986	N	139	32	9517	E	35	08	3281	N	139	32	5683	E	108	198	R/V Rinkai-Maru	St. 2	2018	4	17	Hisanori Kohtsuka	Masanori Okanishi
		Op-814		140220St.4	6		Ophiodermatidae	Ophiopsammus	anchista	H. L. Clark	1911	1	Sagami Sea	35	07	840	N	139	34	453	E	35	07	545	N	139	34	338	E	93.6	100	R/V Rinkai-Maru	St. 4	2014	2	20	Hisanori Kohtsuka	Masanori Okanishi
NSMT	13990			MO-86			Ophiodermatidae	Ophiopsammus	anchista	H. L. Clark	1911	1	Off Jogashima, Misaki, Miura, Kanagawa, Japan																					2022	11	18	Hisanori Kohtsuka	Masanori Okanishi
		Op-831		3342	6		Ophiolepididae	Ophiomusium	scalare	Matsumoto	1917	2	West of Jogashima, Misaki, Miura, Kanagawa, Japan	35	08	3986	N	139	32	9517	E	35	08	3281	N	139	32	5683	E	108	198	R/V Rinkai-Maru	St. 2	2018	4	17	Hisanori Kohtsuka	Masanori Okanishi
		Op-446					Ophiolepididae	Ophioplocus	japonicus	H. L. Clark	1911	1	Araihama, Misaki, Miura, Miura, Kanagawa, Japan																	3.5	3.5			2009	7	3	Hisanori Kohtsuka	Masanori Okanishi
NSMT	13984			MO-2021-25			Ophiolepididae	Ophioplocus	japonicus	H. L. Clark	1911	1	Misaki, Miura, Kanagawa, Japan																					-	-	-	Hisanori Kohtsuka	Masanori Okanishi
		Op-505					Ophiolepididae	Ophioplocus	japonicus	H. L. Clark	1911	1	Araihama, Misaki, Kanagawa, Japan																					2010	-	-	Hisanori Kohtsuka	Masanori Okanishi
		Op-953		121024St.2	3		Ophiolepididae	Ophiozonella	longispina	H.L.Clark	1908	2	West of Jogashima, Misaki, Miura, Kanagawa, Japan	35	07	814	N	139	34	410	E	35	07	492	N	139	34	357	E	95	98		St.2	2012	10	24	Hisanori Kohtsuka	Masanori Okanishi
		Op-1067		121024St.1	3		Ophiolepididae	Ophiozonella	longispina	H.L.Clark	1908	1	Goronba, Off Misaki, Miura, Kanagawa, Japan	35	11	193	N	139	34	758	E	35	10	845	N	139	34	453	E	79	97		St. 1	2012	10	24	Hisanori Kohtsuka	Masanori Okanishi
		Op-1069		121024St.1	6		Ophiolepididae	Ophiozonella	longispina	H.L.Clark	1908	1	Goronba, Off Misaki, Miura, Kanagawa, Japan	35	11	193	N	139	34	758	E	35	10	845	N	139	34	453	E	79	97		St. 1	2012	10	24	Hisanori Kohtsuka	Masanori Okanishi
		Op-759		130625ドレッジ	2		Ophiolepididae	Ophiozonella	projecta	H. L. Clark	1911	1	West of Jogashima, Misaki, Miura, Kanagawa, Japan	35	07	765	N	139	33	309	E	35	08	078	N	139	33	328	E	105	100	R/V Rinkai-Maru	ドレッジ	2013	6	25	Hisanori Kohtsuka	Masanori Okanishi
		Op-631		140219St.2	4		Ophiolepidinae	Ophiozonella	projecta	Koehler	1905	1	West of Jogashima, Misaki, Miura, Kanagawa, Japan	35	06	086	N	139	34	232	E	35	05	862	N	139	34	089	E	238	291	R/V Rinkai-Maru	St. 2	2014	2	19	Hisanori Kohtsuka	Masanori Okanishi
NSMT	13991			1559	4		Ophioleucidae	Ophioleuce	seminudum	Koehler	1904	1	West of Jogashima, Misaki, Miura, Kanagawa, Japan	35	07	186	N	139	33	618	E	35	07	275	N	139	33	272	E	251	323	R/V Rinkai-Maru	St. 1	2014	10	20	Hisanori Kohtsuka	Masanori Okanishi
		Op-562					Ophioleucidae	Ophioleuce	seminudum	Kohler	1904	1	West of Jogashima, Misaki, Miura, Kanagawa, Japan	35	07	538	N	139	33	058	E	35	08	179	N	139	32	353	E	316	264		St. 1	2010	6	2	Hisanori Kohtsuka	Masanori Okanishi
		Op-595		MMBS-EC-030			Ophioleucidae	Ophioleuce	seminudum	Kohler	1904	1	West of Jogashima, Misaki, Miura, Kanagawa, Japan																					-	-	-		Masanori Okanishi
		Op-656		2741	2		Ophioleucidae	Ophioleuce	seminudum	Koehler	1904	2	West of Jogashima, Misaki, Miura, Kanagawa, Japan	35	08	398	N	139	32	875	E	35	08	096	N	139	32	854	E	112	143	R/V Rinkai-Maru	St. 4	2017	2	15	Hisanori Kohtsuka	Masanori Okanishi
		Op-674		3303	2		Ophioleucidae	Ophioleuce	seminudum	Koehler	1904	6	West of Jogashima, Misaki, Miura, Kanagawa, Japan	35	8	494	N	139	34	564	E	35	08	653	N	139	34	212	E	86.6	90.7	R/V Rinkai-Maru	St. 3	2018	4	5	Hisanori Kohtsuka	Masanori Okanishi
		Op-685		2417	2		Ophioleucidae	Ophioleuce	seminudum	Koehler	1904	2	West of Jogashima, Misaki, Miura, Kanagawa, Japan	35	07	4440	N	139	34	2956	E	35	07	6496	N	139	34	0829	E	200	106	R/V Rinkai-Maru	St. 1	2016	9	27	Hisanori Kohtsuka	Masanori Okanishi
		Op-720		140219St.2	1	A	Ophioleucidae	Ophioleuce	seminudum	Kohler	1904	2	West of Jogashima, Misaki, Miura, Kanagawa, Japan	35	06	086	N	139	34	232	E	35	05	862	N	139	34	089	E	238	291	R/V Rinkai-Maru	St. 2	2014	2	19	Hisanori Kohtsuka	Masanori Okanishi
		Op-733		3342	5		Ophioleucidae	Ophioleuce	seminudum	Koehler	1904	1	West of Jogashima, Misaki, Miura, Kanagawa, Japan	35	08	3986	N	139	32	9517	E	35	08	3281	N	139	32	5683	E	108	198	R/V Rinkai-Maru	St. 2	2018	4	17	Hisanori Kohtsuka	Masanori Okanishi
		Op-755		140220St.4	5		Ophioleucidae	Ophioleuce	seminudum	Koehler	1904	1	West of Jogashima, Misaki, Miura, Kanagawa, Japan	35	07	840	N	139	34	453	E	35	07	545	N	139	34	338	E	93.6	100	R/V Rinkai-Maru	St. 4	2014	2	20	Hisanori Kohtsuka	Masanori Okanishi
		Op-883		120419St.1	5		Ophioleucidae	Ophioleuce	seminudum	Kohler	1904	1	West of Jogashima, Misaki, Miura, Kanagawa, Japan	35	07	734	N	139	34	133	E	35	07	714	N	139	33	819	E	98.7			St. 1	2012	4	19	Hisanori Kohtsuka	Masanori Okanishi
		Op-1068		121024St.1	4		Ophioleucidae	Ophioleuce	seminudum	Kohler	1904	1	Goronba, Off Misaki, Miura, Kanagawa, Japan	35	11	193	N	139	34	758	E	35	10	845	N	139	34	453	E	79	97		St. 1	2012	10	24	Hisanori Kohtsuka	Masanori Okanishi
				MO-2021-68			Ophioleucidae	Ophioleuce	seminudum	Kohler	1904	1	West of Jogashima, Misaki, Miura, Kanagawa, Japan																			R/V Rinkai-Maru	St. 3	2021	3	12	Hisanori Kohtsuka/Masanori Okanishi	Masanori Okanishi
				MO-2021-48			Ophioleucidae	Ophioleuce	seminudum	Koehler	1904	1	Sagami Sea	34	33	110	N	139	17	418	E	34	33	651	N	139	17	674	E	143	143	R/V Tansei	L-3-100	2007	11	27	Masanori Okanishi	Masanori Okanishi
		Op-628		131010St.2	2		Ophiomusidae	Ophiomusium	scalare	Lyman	1878	1	Sagami Sea	35	07	873	N	139	33	057	E	35	08	236	N	139	33	166	E	147	102	R/V Shinyo	St. 2	2013	10	10	Hisanori Kohtsuka	Masanori Okanishi
		Op-811		2111	3		Ophiomusidae	Ophiomusium	scalare	Lyman	1878	1	West of Jogashima, Misaki, Miura, Kanagawa, Japan	35	07	6973	N	139	33	6183	E	35	07	4624	N	139	33	8238	E	106	115			2016	4	15	Hisanori Kohtsuka	Masanori Okanishi
		Op-1037		120113St.2	9		Ophiomusidae	Ophiomusium	scalare	Lyman	1878	1	Off Jogashima, Misaki, Miura, Kanagawa, Japan	35	06	041	N	139	34	049	E	35	06	303	N	139	34	465	E	364	158	R/V Rinkai-Maru	St.2	2012	1	13	Hisanori Kohtsuka	Masanori Okanishi
		Op-577		140123St.1	1		Ophiomyxidae	Ophiomyxa	anisacantha	H. L. Clark	1911	1	Sagami Sea	35	07	084	N	139	34	000	E	35	07	112	N	139	34	146	E	258	211	R/V Rinkai-Maru	St. 1	2014	1	23	Hisanori Kohtsuka	Masanori Okanishi
		Op-579		1561	1		Ophiomyxidae	Ophiomyxa	anisacantha	H. L. Clark	1911	1	West of Jogashima, Misaki, Miura, Kanagawa, Japan	35	07	239	N	139	33	522	E	35	07	389	N	139	33	209	E	267	309	R/V Rinkai-Maru	St. 3	2015	10	20	Hisanori Kohtsuka	Masanori Okanishi
		Op-637		1559	1		Ophiomyxidae	Ophiomyxa	anisacantha	H. L. Clark	1911	1	West of Jogashima, Misaki, Miura, Kanagawa, Japan	35	07	186	N	139	33	618	E	35	07	275	N	139	33	272	E	251	323	R/V Rinkai-Maru	St. 1	2014	10	20	Hisanori Kohtsuka	Masanori Okanishi
		Op-637		1559	1		Ophiomyxidae	Ophiomyxa	anisacantha	H. L. Clark	1911	1	West of Jogashima, Misaki, Miura, Kanagawa, Japan	35	07	186	N	139	33	618	E	35	07	275	N	139	33	272	E	251	323	R/V Rinkai-Maru	St. 1	2014	10	20	Hisanori Kohtsuka	Masanori Okanishi
		Op-427	2				Ophiomyxidae	Ophiodera	australis	Lütken	1869	2	Off Jogashima, Misaki, Miura, Kanagawa, Japan																	50	50	R/V Rinkai-Maru		2010	3	2	Hisanori Kohtsuka	Masanori Okanishi
NSMT	13992	Op-640		3239			Ophiomyxidae	Ophiodera	australis	Lütken	1869	1	West of Jogashima, Misaki, Miura, Kanagawa, Japan	35	07	4642	N	139	34	2297	E	35	07	1837	N	139	34	2750	E	153	200	R/V Rinkai-Maru	St. 6	2018	2	23	Hisanori Kohtsuka	Masanori Okanishi
		Op-426	12	Op426	12		Ophiomyxidae	Ophiomyxa	anisacantha	Lutken	1869	1	Off Jogashima, Misaki, Miura, Kanagawa, Japan	35	07	538	N	139	33	058	E	35	08	179	N	139	32	353	E	316	264	R/V Rinkai-Maru		2012	6	2	Hisanori Kohtsuka	Masanori Okanishi
		Op-541					Ophionereididae	Ophionereis	dubia	Müller & Troschel	1842	1	Entrance of Koajiro Inlet, Miura, Kanagawa, Japan																	15	15			2012	7	2	Hisanori Kohtsuka	Masanori Okanishi
		Op-602		MMBS-EC-017			Ophionereididae	Ophionereis	dubia	Müller & Troschel	1842	1																						2006	6	14		Masanori Okanishi
		Op-1066		120315St.1			Ophionereididae	Ophionereis	dubia	Müller & Troschel	1842	1	Entrance of Koajiro Inlet, Miura, Kanagawa, Japan																	12	12			2012	3	15	Hisanori Kohtsuka	Masanori Okanishi
		Op-658		1616			Ophionereididae	Ophionereis	dubia	Müller & Troschell	1842	1	Moroiso, Miura, Kanagawa, Japan																					2015	7	29	Hisanori Kohtsuka	Masanori Okanishi
NSMT	13978	Op-605		131010St.2	1		Ophionereididae	Ophionereis	porrecta	Lyman	1860	1	Sagami Sea	35	07	873	N	139	33	057	E	35	08	236	N	139	33	166	E	147	102	R/V Shinyo	St. 2	2013	10	10	Hisanori Kohtsuka	Masanori Okanishi
NSMT	13978	Op-605		131010St.2	1		Ophionereididae	Ophionereis	porrecta	Lyman	1860	1	Sagami Sea				N				E				N				E				St. 2	2013	10	10	Hisanori Kohtsuka	Masanori Okanishi
		Op-823		1075	4		Ophionereididae	Ophionereis	porrecta?			1	West of Jogashima, Misaki, Miura, Kanagawa, Japan	35	08	5147	N	139	34	8157	E	35	08	1108	N	139	34	8027	E	80.7	85.7	R/V Rinkai-Maru	St. 3	2015	3	9	Hisanori Kohtsuka	Masanori Okanishi
		Op-426-11		Op426	11		Ophiopholidae	Ophiopholis	aculeata	Matsumoto	1915	5	West of Jogashima, Misaki, Miura, Kanagawa, Japan	35	07	538	N	139	33	058	E	35	08	179	N	139	32	353	E	316	264	R/V Rinkai-Maru		2012	6	2	Hisanori Kohtsuka	Masanori Okanishi
NSMT	13844	Op-643		3024	3		Ophiopholidae	Ophiopholis	aculeata	Lyman	1879	1	Off Jogashima, Misaki, Miura, Kanagawa, Japan																			R/V Shinyo		2017	10	27	Hisanori Kohtsuka	Masanori Okanishi
		Op-643		3024	3		Ophiopholidae	Ophiopholis	aculeata	Lyman	1879	1	Off Jogashima, Misaki, Miura, Kanagawa, Japan																			R/V Shinyo		2017	10	27	Hisanori Kohtsuka	Masanori Okanishi
		Op-647		1889			Ophiopholidae	Ophiopholis	aculeata	Lyman	1879	1	West of Jogashima, Misaki, Miura, Kanagawa, Japan	35	07	746	N	139	33	4213	E	35	07	37	N	139	33	6856	E	419	519	R/V Rinkai-Maru	St. 6	2015	12	10	Hisanori Kohtsuka	Masanori Okanishi
		Op-666		2766	1	1	Ophiopholidae	Ophiopholis	aculeata	Lyman	1879	1	West of Jogashima, Misaki, Miura, Kanagawa, Japan	35	06	9342	N	139	33	5569	E	35	06	6013	N	139	33	1174	E	440	541	R/V Rinkai-Maru	St. 6	2017	2	16	Hisanori Kohtsuka	Masanori Okanishi
		Op-723		1561	3		Ophiopholidae	Ophiopholis	aculeata	Lyman	1879	1	West of Jogashima, Misaki, Miura, Kanagawa, Japan	35	07	239	N	139	33	522	E	35	07	389	N	139	33	209	E	267	309	R/V Rinkai-Maru	St. 3	2015	10	20	Hisanori Kohtsuka	Masanori Okanishi
		Op-728		1906	3		Ophiopholidae	Ophiopholis	aculeata	Lyman	1879	1	Off Jogashima, Misaki, Miura, Kanagawa, Japan	35	06	9987	N	139	33	6545	E	35	06	9566	N	139	33	2123	E	473	600	R/V Rinkai-Maru	St. 1	2016	2	18	Hisanori Kohtsuka	Masanori Okanishi
		Op-793		1881	5		Ophiopholidae	Ophiopholis	aculeata	Lyman	1879	1	West of Jogashima, Misaki, Miura, Kanagawa, Japan	35	06	9490	N	139	33	7381	E	35	06	7231	N	139	34	0574	E	398	230	R/V Rinkai-Maru	St. 5	2015	12	10	Hisanori Kohtsuka	Masanori Okanishi
		Op-810		2766	4		Ophiopholidae	Ophiopholis	aculeata	Lyman	1879	1	West of Jogashima, Misaki, Miura, Kanagawa, Japan	35	06	9342	N	139	33	5569	E	35	06	6013	N	139	33	1174	E	440	541	R/V Rinkai-Maru	St. 6	2017	2	16	Hisanori Kohtsuka	Masanori Okanishi
		Op-493					Ophiopholidae	Ophiopholis	brachyactis	H. L. Clark	1911	1	Off Jogashima, Misaki, Miura, Kanagawa, Japan																					2011	10	24	Hisanori Kohtsuka	Masanori Okanishi
		Op-497					Ophiopholidae	Ophiopholis	brachyactis	H. L. Clark	1911	1	Off Jogashima, Misaki, Miura, Kanagawa, Japan																	80				2011	10	27	Hisanori Kohtsuka	Masanori Okanishi
		Op-513					Ophiopholidae	Ophiopholis	brachyactis	H. L. Clark	1911	2	Off Jogashima, Misaki, Miura, Kanagawa, Japan	35	07	301	N	139	33	365	E	35	07	327	N	139	32	978	E	300	493		St. 1	2012	2	24	Hisanori Kohtsuka	Masanori Okanishi
		Op-569					Ophiopholidae	Ophiopholis	brachyactis	H. L. Clark	1911	1	Entrance of Koajiro Inlet, Miura, Kanagawa, Japan	35	08	889	N	139	35	512	E	35	08	755	N	139	35	435	E	60	64,5	R/V Rinkai-Maru	St.1	2010	6	24	Hisanori Kohtsuka	Masanori Okanishi
		Op-692		2766	1	2	Ophiopholidae	Ophiopholis	brachyactis	H. L. Clark	1911	1	West of Jogashima, Misaki, Miura, Kanagawa, Japan	35	06	9342	N	139	33	5569	E	35	06	6013	N	139	33	1174	E	440	541	R/V Rinkai-Maru	St. 6	2017	2	16	Hisanori Kohtsuka	Masanori Okanishi
		Op-626		1848	2		Ophiopholidae	Ophiopholis	brachyaspis	H. L. Clark	1911	5	West of Jogashima, Misaki, Miura, Kanagawa, Japan	35	7	3455	N	139	34	2564	E	35	07	1502	N	139	33	8646	E	219	320	R/V Rinkai-Maru	St. 4	2015	12	10	Hisanori Kohtsuka	Masanori Okanishi
		Op-659		1559	3		Ophiopholidae	Ophiopholis	brachyaspis	H. L. Clark	1911	3	West of Jogashima, Misaki, Miura, Kanagawa, Japan	35	07	186	N	139	33	618	E	35	07	275	N	139	33	272	E	251	323	R/V Rinkai-Maru	St. 1	2014	10	20	Hisanori Kohtsuka	Masanori Okanishi
		Op-663		960	3		Ophiopholidae	Ophiopholis	brachyaspis	H. L. Clark	1911	1	Off Jogashima, Misaki, Miura, Kanagawa, Japan	35	08	5591	N	139	32	7390	E	35	08	4585	N	139	32	2040	E	133	274	R/V Rinkai-Maru	St. 2	2015	2	12	Hisanori Kohtsuka	Masanori Okanishi
		Op-680		140220St.4	2		Ophiopholidae	Ophiopholis	brachyaspis	H. L. Clark	1911	3	Sagami Sea	35	07	840	N	139	34	453	E	35	07	545	N	139	34	338	E	93.6	100	R/V Rinkai-Maru	St. 4	2014	2	20	Hisanori Kohtsuka	Masanori Okanishi
NSMT	13981	OP-681		2717	1		Ophiopholidae	Ophiopholis	brachyaspis	H. L. Clark	1911	4	Off Jogashima, Misaki, Miura, Kanagawa, Japan	35	06	929	N	139	33	814	E	35	06	644	N	139	33	739	E	360	365	R/V Rinkai-Maru	St. 1	2017	2	15	Hisanori Kohtsuka	Masanori Okanishi
NSMT	13981	OP-681		2717	1		Ophiopholidae	Ophiopholis	brachyaspis	H. L. Clark	1911	4	Off Jogashima, Misaki, Miura, Kanagawa, Japan	35	06	929	N	139	33	814	E	35	06	644	N	139	33	739	E	360	365	R/V Rinkai-Maru	St. 1	2017	2	15	Hisanori Kohtsuka	Masanori Okanishi
		Op-730		140123St.1	3		Ophiopholidae	Ophiopholis	brachyaspis	H. L. Clark	1911	3	Sagami Sea	35	07	084	N	139	34	000	E	35	07	112	N	139	34	146	E	258	211	R/V Rinkai-Maru	St. 1	2014	1	23	Hisanori Kohtsuka	Masanori Okanishi
		Op-780		1881	4		Ophiopholidae	Ophiopholis	brachyaspis	H. L. Clark	1911	1	West of Jogashima, Misaki, Miura, Kanagawa, Japan	35	06	9490	N	139	33	7381	E	35	06	7231	N	139	34	0574	E	398	230	R/V Rinkai-Maru	St. 5	2015	12	10	Hisanori Kohtsuka	Masanori Okanishi
		Op-560					Ophiopholidae	Ophiopholis	mirabilis	Duncan	1879	8	West of Jogashima, Misaki, Miura, Kanagawa, Japan	35	07	538	N	139	33	058	E	35	08	179	N	139	32	353	E	316	264		St. 1	2010	6	2	Hisanori Kohtsuka	Masanori Okanishi
		Op-862		435			Ophiopholidae	Ophiopholis	mirabilis	Duncan	1879	2	Off Jogashima, Misaki, Miura, Kanagawa, Japan																					2009	9	15	Hisanori Kohtsuka	Masanori Okanishi
		Op-940		3229	2		Ophiopholidae	Ophiopholis	mirabilis	Duncan	1879	3	West of Jogashima, Misaki, Miura, Kanagawa, Japan	35	09	0033	N	139	35	0001	E	35	08	6171	N	139	34	8529	E	75.9	79.7	R/V Rinkai-Maru	St. 5	2018	2	22	Hisanori Kohtsuka	Masanori Okanishi
		Op-941		2619	1		Ophiopholidae	Ophiopholis	mirabilis	Duncan	1879	1	Around Shisiki-jima, Oki, Shimane, Japan	36	09	2231	N	133	13	5597	E	36	09	1472	N	133	13	4646	E	46.8	46.2	R/V Garathea	St. 2	2016	10	12	Hisanori Kohtsuka	Masanori Okanishi
		Op-598		MMBS-EC-080			Ophiopholidae	Ophiopholis	mirabillis	Duncan	1879	1																		80								Masanori Okanishi
NSMT	13980	Op-819		1075	5		Ophiopholidae	Ophiopholis	mirabillis	Duncan	1879	1	West of Jogashima, Misaki, Miura, Kanagawa, Japan	35	08	5147	N	139	34	8157	E	35	08	1108	N	139	34	8027	E	80.7	85.7	R/V Rinkai-Maru	St. 3	2015	3	9	Hisanori Kohtsuka	Masanori Okanishi
NSMT	13980	Op-819		1075	5		Ophiopholidae	Ophiopholis	mirabillis	Duncan	1879	1	West of Jogashima, Misaki, Miura, Kanagawa, Japan	35	08	5147	N	139	34	8157	E	35	08	1108	N	139	34	8027	E	80.7	85.7	R/V Rinkai-Maru	St. 3	2015	3	9	Hisanori Kohtsuka	Masanori Okanishi
		Op-467-1		Op-467	1		Ophiopsilidae	Ophiopsila	squamifera	Murakami	1963	1	Off Jogashima, Misaki, Miura, Kanagawa, Japan																	80	80	R/V Rinkai-Maru		2011	5	19	Hisanori Kohtsuka	Masanori Okanishi
		op-494					Ophiopsilidae	Ophiopsila	squamifera	Murakami	1963	1	Off Jogashima, Misaki, Miura, Kanagawa, Japan																					2011	10	24	Hisanori Kohtsuka	Masanori Okanishi
		Op-500					Ophiopsilidae	Ophiopsila	squamifera	Murakami	1963	1	Off Jogashima, Misaki, Miura, Kanagawa, Japan																	80				2011	10	27	Hisanori Kohtsuka	Masanori Okanishi
		Op-558		100302St.1			Ophiopsilidae	Ophiopsila	squamifera	Murakami	1963	7	West of Jogashima, Misaki, Miura, Kanagawa, Japan	35	07	538	N	139	33	058	E	35	08	179	N	139	32	353	E	316	264		St.1	2010	6	2	Hisanori Kohtsuka	Masanori Okanishi
		Op-614		598	1		Ophiopsilidae	Ophiopsila	squamifera	Murakami	1963	2	Off Jogashima, Misaki, Miura, Kanagawa, Japan	35	08	359	N	139	34	753	E	35	08	649	N	139	34	328	E	85.5	91.4	R/V Rinkai-Maru	St. 1	2014	7	28	Hisanori Kohtsuka	Masanori Okanishi
		Op-650		1744	1		Ophiopsilidae	Ophiopsila	squamifera	Murakami	1963	1	Off Jogashima, Misaki, Miura, Kanagawa, Japan	35	05	348	N	139	35	312	E	35	05	384	N	139	36	144	E	106	106	R/V Shinyo	St. 5	2015	11	1	Hisanori Kohtsuka	Masanori Okanishi
NSMT	13982	Op-653		1617			Ophiopsilidae	Ophiopsila	squamifera	Murakami	1963	1	West of Jogashima, Misaki, Miura, Kanagawa, Japan	35	08	365	N	139	33	693	E	35	08	319	N	139	33	470	E	95.9	96.9	R/V Rinkai-Maru	St. 1	2015	7	29	Hisanori Kohtsuka	Masanori Okanishi
NSMT	13982	Op-653		1617			Ophiopsilidae	Ophiopsila	squamifera	Murakami	1963	1	West of Jogashima, Misaki, Miura, Kanagawa, Japan	35	08	365	N	139	33	693	E	35	08	319	N	139	33	470	E	95.9	96.9	R/V Rinkai-Maru	St. 1	2015	7	29	Hisanori Kohtsuka	Masanori Okanishi
		Op-655		1075	2		Ophiopsilidae	Ophiopsila	squamifera	Murakami	1963	2	West of Jogashima, Misaki, Miura, Kanagawa, Japan	35	08	5147	N	139	34	8157	E	35	08	1108	N	139	34	8027	E	80.7	85.7	R/V Rinkai-Maru	St. 3	2015	3	9	Hisanori Kohtsuka	Masanori Okanishi
		Op-790		131031	2		Ophiopsilidae	Ophiopsila	squamifera	Murakami	1963	1	Sagami Sea	35	08	250	N	139	34	732	E	35	08	967	N	139	34	744	E	86.8	88.6	R/V Rinkai-Maru		2013	10	31	Hisanori Kohtsuka	Masanori Okanishi
		Op-815		120419St.2	3		Ophiopsilidae	Ophiopsila	squamifera	Murakami	1963	1	Sagami Sea	35	07	810	N	139	34	072	E	35	07	814	N	139	33	814	E	97.3	100	R/V Rinkai-Maru	St. 2	2012	4	19	Hisanori Kohtsuka	Masanori Okanishi
		Op-837		120419St.1	3		Ophiopsilidae	Ophiopsila	squamifera	Murakami	1963	1	Off Jogashima, Misaki, Miura, Kanagawa, Japan	35	07	734	N	139	34	133	E	35	07	714	N	139	33	819	E	98.7		R/V Rinkai-Maru	St. 1	2012	4	19	Hisanori Kohtsuka	Masanori Okanishi
		Op-838		120314St.4	1		Ophiopsilidae	Ophiopsila	squamifera	Murakami	1963	2	Off Jogashima, Misaki, Miura, Kanagawa, Japan	35	08	156	N	139	34	783	E	35	07	901	N	139	34	806	E	87.5	88.6	R/V Rinkai-Maru	St.4	2012	3	14	Hisanori Kohtsuka	Masanori Okanishi
		Op-841		140219St.1	6	1	Ophiopsilidae	Ophiopsila	squamifera	Murakami	1963	3	Off Jogashima, Misaki, Miura, Kanagawa, Japan	35	08	471	N	139	34	748	E	35	08	191	N	139	34	644	E	85	89.1	R/V Rinkai-Maru	St. 1	2014	2	19	Hisanori Kohtsuka	Masanori Okanishi
		Op-934		MMBS-EC-60			Ophiopsilidae	Ophiopsila	squamifera	Murakami	1963	1	West of Jogashima, Misaki, Miura, Kanagawa, Japan																				St. 3	2006	10	25	Yuji Ise, Norio Miyamoto	Masanori Okanishi
		Op-1070		121024St.1	7		Ophiopsilidae	Ophiopsila	squamifera	Murakami	1963	1	Goronba, Off Misaki, Miura, Kanagawa, Japan	35	11	193	N	139	34	758	E	35	10	845	N	139	34	453	E	79	97		St. 1	2012	10	24	Hisanori Kohtsuka	Masanori Okanishi
		Op-426-13		Op426	13		Ophiopyrgidae	Stegophiura	sladeni	Duncan	1879	1		35	07	538	N	139	33	058	E	35	08	179	N	139	32	353	E	316	264	R/V Rinkai-Maru		2012	6	2	Hisanori Kohtsuka	Masanori Okanishi
		Op-432					Ophiopyrgidae	Stegophiura	sladeni	Duncan	1879	2	Off Jogashima, Misaki, Miura, Kanagawa, Japan																	85				2009	6	15	Hisanori Kohtsuka	Masanori Okanishi
		Op-468					Ophiopyrgidae	Stegophiura	sladeni	Duncan	1879	1	Off Jogashima, Misaki, Miura, Kanagawa, Japan																	80	80			2011	5	19	Hisanori Kohtsuka	Masanori Okanishi
		Op-479					Ophiopyrgidae	Stegophiura	sladeni	Duncan	1879	1	Off Jogashima, Misaki, Miura, Kanagawa, Japan																					2011	6	30	Hisanori Kohtsuka	Masanori Okanishi
		Op-492					Ophiopyrgidae	Stegophiura	sladeni	Duncan	1879	3	Off Jogashima, Misaki, Miura, Kanagawa, Japan																					2011	10	24	Hisanori Kohtsuka	Masanori Okanishi
		Op-495					Ophiopyrgidae	Stegophiura	sladeni	Duncan	1879	3	West of Jogashima, Misaki, Miura, Kanagawa, Japan																			R/V Rinkai-Maru		2011	10	24	Hisanori Kohtsuka	Masanori Okanishi
		Op-521					Ophiopyrgidae	Stegophiura	sladeni	Duncan	1879	1	Off Jogashima, Misaki, Miura, Kanagawa, Japan	35	08	336	N	139	35	144	E	35	08	348	N	139	34	732	E	77.5	87.3		St. 2	2012	2	24	Hisanori Kohtsuka	Masanori Okanishi
		Op-532		111027			Ophiopyrgidae	Stegophiura	sladeni	Duncan	1879	5	Off Jogashima, Misaki, Miura, Kanagawa, Japan	35	10	374	N	139	34	866	E	35	10	239	N	139	34	750	E	82.7	87.3	R/V Rinkai-Maru	St. 1	2011	10	27	Hisanori Kohtsuka	Masanori Okanishi
		Op-618		140219St.1	1	1	Ophiopyrgidae	Stegophiura	sladeni	Duncan	1879	2	Off Jogashima, Misaki, Miura, Kanagawa, Japan	35	08	471	N	139	34	748	E	35	08	191	N	139	34	644	E	85	89.1	R/V Rinkai-Maru	St. 1	2014	2	19	Hisanori Kohtsuka	Masanori Okanishi
		Op-678		140123St.3	2		Ophiopyrgidae	Stegophiura	sladeni	Duncan	1879	1	Sagami Sea	35	09	305	N	139	35	208	E	35	09	481	N	139	35	151	E	72	75.9	R/V Rinkai-Maru	St. 3	2014	1	23	Hisanori Kohtsuka	Masanori Okanishi
		Op-678		140123St.3	2		Ophiopyrgidae	Stegophiura	sladeni	Duncan	1879	1	Sagami Sea	35	09	305	N	139	35	208	E	35	09	481	N	139	35	151	E	72	75.9		St. 3	2014	1	23	Hisanori Kohtsuka	Masanori Okanishi
		Op-930		121024St.1-2			Ophiopyrgidae	Stegophiura	sladeni	Duncan	1879	8	Goronba, Off Misaki, Miura, Kanagawa, Japan	35	11	193	N	139	34	758	E	35	08	643	N	139	34	725	E	79	97	R/V Rinkai-Maru	St. 1	2012	10	24	Hisanori Kohtsuka	Masanori Okanishi
				MO-2021-3			Ophiopyrgidae	Stegophiura	sladeni	Duncan	1879	1	Off Jogashima, Misaki, Miura, Kanagawa, Japan	35	08	780	N	139	34	774	E	35	9	64	N	139	34	348	E	80-89.8		R/V Rinkai-Maru	St. 3	2018	5	23	Hisanori Kohtsuka	Masanori Okanishi
				1559	2		Ophiopyrgidae	Stegophiura	sterea	H. L. Clark	1911	1	West of Jogashima, Misaki, Miura, Kanagawa, Japan	35	07	186	N	139	33	618	E	35	07	275	N	139	33	272	E	251	323	R/V Rinkai-Maru	St. 1	2014	10	20	Hisanori Kohtsuka	Masanori Okanishi
		Op-682		2780	2		Ophiopyrgidae	Stegophiura	sterea	H. L. Clark	1908	1	West of Jogashima, Misaki, Miura, Kanagawa, Japan	35	06	9342	N	139	33	5569	E	35	06	6013	N	139	33	1174	E	440	541	R/V Rinkai-Maru	St. 6	2017	2	16	Hisanori Kohtsuka	Masanori Okanishi
		Op-682		2780	2		Ophiopyrgidae	Stegophiura	sterea	H. L. Clark	1908	1	West of Jogashima, Misaki, Miura, Kanagawa, Japan	35	06	9342	N	139	33	5569	E	35	06	6013	N	139	33	1174	E	440	541	R/V Rinkai-Maru	St. 6	2017	2	16	Hisanori Kohtsuka	Masanori Okanishi
				2619	2		Ophiopyrgidae	Stegophiura	vivipara	Matsumoto	1915	8	Around Shisiki-jima, Oki, Shimane, Japan	36	09	223	N	133	13	5597	E	36	09	1472	N	139	13	4646	E	46.8	46.2	R/V Garathea	St. 2	2016	10	12	Hisanori Kohtsuka	Masanori Okanishi
		Op-502					Ophiopyrgidae	Stegophiura	vivipara	Matsumoto	1915	6	Off Jogashima, Misaki, Miura, Kanagawa, Japan																	80				2011	10	27	Hisanori Kohtsuka	Masanori Okanishi
		Op-687		2560	3		Ophiopyrgidae	Stegophiura	vivipara	Matsumoto	1915	2	West of Jogashima, Misaki, Miura, Kanagawa, Japan	35	07	680	N	139	34	337	E	35	07	338	N	139	34	299	E	96.2	200	R/V Rinkai-Maru	St. 2	2016	11	16	Hisanori Kohtsuka	Masanori Okanishi
		Op-688		3317			Ophiopyrgidae	Stegophiura	vivipara	Matsumoto	1915	42	West of Jogashima, Misaki, Miura, Kanagawa, Japan	35	08	7801	N	139	34	3530	E	35	08	7262	N	139	33	9993	E	89	92.1	R/V Rinkai-Maru	St. 1	2018	4	17	Hisanori Kohtsuka	Masanori Okanishi
		Op-688		3317			Ophiopyrgidae	Stegophiura	vivipara	Matsumoto	1915	42	West of Jogashima, Misaki, Miura, Kanagawa, Japan	35	08	7801	N	139	34	3530	E	35	08	7262	N	139	33	9993	E	89	92.1	R/V Rinkai-Maru	St. 1	2018	4	17	Hisanori Kohtsuka	Masanori Okanishi
		Op-713		1041	1		Ophiopyrgidae	Stegophiura	vivipara	Matsumoto	1915	2	West of Jogashima, Misaki, Miura, Kanagawa, Japan	35	7	6442	N	139	34	3682	E	35	07	3441	N	139	34	3072	E	98.8	184		st.2	2015	03	09	Hisanori Kohtsuka	Masanori Okanishi
		Op-724		2741	1		Ophiopyrgidae	Stegophiura	vivipara	Matsumoto	1915	3	West of Jogashima, Misaki, Miura, Kanagawa, Japan	35	08	398	N	139	32	875	E	35	08	096	N	139	32	854	E	112	143	R/V Rinkai-Maru	St. 4	2017	2	15	Hisanori Kohtsuka	Masanori Okanishi
		Op-756		2059	1		Ophiopyrgidae	Stegophiura	vivipara	Matsumoto	1915	2	West of Jogashima, Misaki, Miura, Kanagawa, Japan	35	07	544	N	139	34	256	E	35	07	264	N	139	34	110	E	110	256	R/V Rinkai-Maru	St. 1	2016	4	14	Hisanori Kohtsuka	Masanori Okanishi
		Op-763		1848	5		Ophiopyrgidae	Stegophiura	vivipara	Matsumoto	1915	2	West of Jogashima, Misaki, Miura, Kanagawa, Japan	35	08	913	N	139	34	268	E	35	08	993	N	139	34	809	E	85	84.1	R/V Rinkai-Maru		2013	7	24	Hisanori Kohtsuka	Masanori Okanishi
		Op-767		2545			Ophiopyrgidae	Stegophiura	vivipara	Matsumoto	1915	7	West of Jogashima, Misaki, Miura, Kanagawa, Japan	35	08	907	N	139	33	785	E	35	08	619	N	139	33	784	E	96.9	94.2	R/V Rinkai-Maru	St. 1	2016	11	16	Hisanori Kohtsuka	Masanori Okanishi
		Op-787		1075	6		Ophiopyrgidae	Stegophiura	vivipara	Matsumoto	1915	1	West of Jogashima, Misaki, Miura, Kanagawa, Japan	35	08	5147	N	139	34	8157	E	35	08	1108	N	139	34	8027	E	80.7	85.7	R/V Rinkai-Maru	St. 3	2015	3	9	Hisanori Kohtsuka	Masanori Okanishi
		Op-797		3362			Ophiopyrgidae	Stegophiura	vivipara	Matsumoto	1915	5	West of Jogashima, Misaki, Miura, Kanagawa, Japan	35	08	822	N	139	34	735	E	35	08	723	N	139	35	010	E	81	74.7	R/V Rinkai-Maru	St. 1	2018	5	14	Hisanori Kohtsuka	Masanori Okanishi
		Op-798		1428	2		Ophiopyrgidae	Stegophiura	vivipara	Matsumoto	1915	1	West of Jogashima, Misaki, Miura, Kanagawa, Japan	35	8	275	N	139	33	120	E	35	08	442	N	139	32	889	E	106	110		st.2	2015	06	16	Hisanori Kohtsuka	Masanori Okanishi
		Op-805		3303	4		Ophiopyrgidae	Stegophiura	vivipara	Matsumoto	1915	4	West of Jogashima, Misaki, Miura, Kanagawa, Japan	35	8	494	N	139	34	564	E	35	08	653	N	139	34	212	E	86.6	90.7	R/V Rinkai-Maru	st.3	2018	04	05	Hisanori Kohtsuka	Masanori Okanishi
		Op-863		434			Ophiopyrgidae	Stegophiura	vivipara	Matsumoto	1915	14	Off Jogashima, Misaki, Miura, Kanagawa, Japan																					2009	5	15	Hisanori Kohtsuka	Masanori Okanishi
		Op-881		2111	1		Ophiopyrgidae	Stegophiura	vivipara	Matsumoto	1915	2	West of Jogashima, Misaki, Miura, Kanagawa, Japan	35	07	6973	N	139	33	6183	E	35	07	4624	N	139	33	8238	E	106	115			2016	4	15	Hisanori Kohtsuka	Masanori Okanishi
		Op-884		2620	1		Ophiopyrgidae	Stegophiura	vivipara	Matsumoto	1915	1	Around Shisiki-jima, Oki, Shimane, Japan	36	09	223	N	133	13	5597	E	36	09	1472	N	139	13	4646	E	46.8	46.2	R/V Garathea	St. 2	2016	10	12	Hisanori Kohtsuka	Masanori Okanishi
		Op-886		130501St.2	2	2	Ophiopyrgidae	Stegophiura	vivipara	Matsumoto	1915	1	Off Jogashima, Misaki, Miura, Kanagawa, Japan	35	08	957	N	139	34	749	E	35	08	480								R/V Rinkai-Maru	St. 2	2013	5	1	Hisanori Kohtsuka	Masanori Okanishi
		Op-896		120419St.1	7		Ophiopyrgidae	Stegophiura	vivipara	Matsumoto	1915	1	Sagami Sea	35	07	734	N	139	34	133	E	35	07	714	N	139	33	819	E	98.7		R/V Rinkai-Maru	St. 1	2012	4	19	Hisanori Kohtsuka	Masanori Okanishi
				MO-26			Ophiopyrgidae	Stegophiura	vivipara	Matsumoto	1915	1	West of Jogashima, Misaki, Miura, Kanagawa, Japan	35	08	419		139	33	419		35	08	121	N	139	33	530	E	100	103	R/V Rinkai-Maru	St.3	2015	1	20	Hisanori Kohtsuka	Masanori Okanishi
				MO-28			Ophiopyrgidae	Stegophiura	vivipara	Matsumoto	1915	19	West of Jogashima, Misaki, Miura, Kanagawa, Japan	35	08	419		139	33	419		35	08	121	N	139	33	530	E	100	103	R/V Rinkai-Maru	St.3	2015	1	20	Hisanori Kohtsuka	Masanori Okanishi
				1827			Ophiosphalmidae	Ophiosphalma	cancellatum	Lyman	1878	4	West of Jogashima, Misaki, Miura, Kanagawa, Japan	35	07	1905	N	139	34	1205	E	35	07	1687	N	139	33	7422	E	294	365	R/V Rinkai-Maru	St. 2	2016	12	9	Hisanori Kohtsuka	Masanori Okanishi
				1839	1		Ophiosphalmidae	Ophiosphalma	cancellatum	Lyman	1878	8	Off Jogashima, Misaki, Miura, Kanagawa, Japan	35	06	9365	N	139	33	7267	E	35	06	8574	N	139	33	2876	E	385	479	R/V Rinkai-Maru	St. 3	2015	12	9	Hisanori Kohtsuka	Masanori Okanishi
		Op-516-1		Op-516	1		Ophiosphalmidae	Ophiosphalma	cancellatum	Lyman	1878	1	West of Jogashima, Misaki, Miura, Kanagawa, Japan	35	07	301	N	139	33	365	E	35	07	327	N	139	32	978	E	300	493		St. 2	2012	2	24	Hisanori Kohtsuka	Masanori Okanishi
		Op-583		3185	1		Ophiosphalmidae	Ophiosphalma	cancellatum	Lyman	1878	8	West of Jogashima, Misaki, Miura, Kanagawa, Japan	35	07	1136	N	139	33	2577	E	35	06	6949	N	139	33	2577	E	440	445	R/V Rinkai-Maru	St. 1	2018	2	22	Hisanori Kohtsuka	Masanori Okanishi
		Op-615		1906	2	2	Ophiosphalmidae	Ophiosphalma	cancellatum	Lyman	1878	1	Off Jogashima, Misaki, Miura, Kanagawa, Japan	35	06	9987	N	139	33	6545	E	35	06	9566	N	139	33	2123	E	473	600	R/V Rinkai-Maru	St. 1	2016	2	18	Hisanori Kohtsuka	Masanori Okanishi
		Op-615		1906	2	2	Ophiosphalmidae	Ophiosphalma	cancellatum	Lyman	1878	1	Off Jogashima, Misaki, Miura, Kanagawa, Japan	35	06	9987	N	139	33	6545	E	35	06	9566	N	139	33	2123	E	473	600	R/V Rinkai-Maru	St. 1	2016	2	18	Hisanori Kohtsuka	Masanori Okanishi
		Op-627		1827	1		Ophiosphalmidae	Ophiosphalma	cancellatum	Lyman	1878	5	West of Jogashima, Misaki, Miura, Kanagawa, Japan	35	07	1905	N	139	34	1205	E	35	07	1687	N	139	33	7422	E	294	365	R/V Rinkai-Maru	St. 2	2016	12	9	Hisanori Kohtsuka	Masanori Okanishi
		Op-639		1483	2		Ophiosphalmidae	Ophiosphalma	cancellatum	Lyman	1878	7	West of Jogashima, Misaki, Miura, Kanagawa, Japan	35	07	1660	N	139	34	1771	E	35	06	7619	N	139	34	1630	E	282	238	R/V Rinkai-Maru	St. 1	2015	6	25	Hisanori Kohtsuka	Masanori Okanishi
		Op-641		1881	3		Ophiosphalmidae	Ophiosphalma	cancellatum	Lyman	1878	4	West of Jogashima, Misaki, Miura, Kanagawa, Japan	35	06	9490	N	139	33	7381	E	35	06	7231	N	139	34	0574	E	398	230	R/V Rinkai-Maru	St. 5	2015	12	10	Hisanori Kohtsuka	Masanori Okanishi
		Op-660		130617St.3	2		Ophiosphalmidae	Ophiosphalma	cancellatum	Lyman	1878	4	West of Jogashima, Misaki, Miura, Kanagawa, Japan	35	06	251	N	139	34	442	E	35	06	613	N	139	33	850	E	147	335	R/V Rinkai-Maru	St. 3	2013	6	17	Hisanori Kohtsuka	Masanori Okanishi
		Op-854		100624St.2			Ophiosphalmidae	Ophiosphalma	cancellatum	Lyman	1878	2	Off Jogashima, Misaki, Miura, Kanagawa, Japan	35	08	700	N	139	34	400	E	35	08	421	N	139	34	197	E	92.3	91.8	R/V Rinkai-Maru		2010	6	24	Hisanori Kohtsuka	Masanori Okanishi
		Op-865		1889	3		Ophiosphalmidae	Ophiosphalma	cancellatum	Lyman	1878	4	West of Jogashima, Misaki, Miura, Kanagawa, Japan	35	07	746	N	139	33	4213	E	35	07	37	N	139	33	6856	E	419	519	R/V Rinkai-Maru	St. 6	2015	12	10	Hisanori Kohtsuka	Masanori Okanishi
		Op-866		1839	1		Ophiosphalmidae	Ophiosphalma	cancellatum	Lyman	1878	3	Off Jogashima, Misaki, Miura, Kanagawa, Japan	35	06	9365	N	139	33	7267	E	35	06	8574	N	139	33	2876	E	385	479	R/V Rinkai-Maru	St. 3	2015	12	9	Hisanori Kohtsuka	Masanori Okanishi
		Op-871		140219St.2	2	1	Ophiosphalmidae	Ophiosphalma	cancellatum	Lyman	1878	2	Sagami Sea	35	06	086	N	139	34	232	E	35	05	862	N	139	34	089	E	238	291	R/V Rinkai-Maru	St. 2	2014	2	19	Hisanori Kohtsuka	Masanori Okanishi
		Op-919		120113St.2	3		Ophiosphalmidae	Ophiosphalma	cancellatum	Lyman	1878	51	Off Jogashima, Misaki, Miura, Kanagawa, Japan	35	06.	041	N	139	34	049	E	35	06	303	N	139	34	465	E	364	158	R/V Rinkai-Maru	St. 2	2012	1	13	Hisanori Kohtsuka	Masanori Okanishi
				MO-2021-70			Ophiosphalmidae	Ophiosphalma	cancellatum	Lyman	1878	numerous	West of Jogashima, Misaki, Miura, Kanagawa, Japan																			R/V Rinkai-Maru	St. 3	2021	3	12	Hisanori Kohtsuka/Masanori Okanishi	Masanori Okanishi
NSMT	13847			MO-2021-8			Ophiosphalmidae	Ophiosphalma	cancellatum	Lyman	1878	10<	Off Jogashima, Misaki, Miura, Kanagawa, Japan	35	07	054	N	139	33	990	E	35	07	64	N	139	33	662	E	384	478	R/V Rinkai-Maru	St. 3	2020	7	30	Masanori Okanishi	Masanori Okanishi
		Op425	1				Ophiotrichidae	Macrophiothrix	longipeda	Lamarck	1816	1	Araihama, Misaki, Miura, Miura, Kanagawa, Japan																	0.3	0.3			2009	8	16	Hisanori Kohtsuka	Masanori Okanishi
		Op-545					Ophiotrichidae	Macrophiothrix	longipeda	Lamarck	1816	1	Aburatsubo Bay, Kanagawa, Japan																	0	0			2012	8	1	Hisanori Kohtsuka	Masanori Okanishi
		Op-642		MO-2021-20			Ophiotrichidae	Macrophiothrix	longipeda	Lamarck	1816	1	Off Kaigai, Miraki, Miura, Kanagawa, Japan																	15				2019	9	29	Manabu Ogawa	Masanori Okanishi
				MO-2021-19			Ophiotrichidae	Macrophiothrix	longipeda	Lamarck	1816	1	Off Kaigai, Miraki, Miura, Kanagawa, Japan																	15				2019	9	29	Manabu Ogawa	Masanori Okanishi
				MO-2021-19			Ophiotrichidae	Macrophiothrix	longipeda	Lamarck	1816	1	Off Kaigai, Miraki, Miura, Kanagawa, Japan																					2019	9	29	Manabu Ogawa	Masanori Okanishi
				MO-2021-18			Ophiotrichidae	Macrophiothrix	longipeda	Lamarck	1816	1	Kagoshima, Araihama, Misaki, Miura, Kanagawa, Japan																	3	3			2020	3	26	Hisanori Kohtsuka	Masanori Okanishi
		Op-428					Ophiotrichidae	Ophiomaza	cacaotica	Lyman	1871	1	Manazuru, Kanagawa, Japan																	10	10			2009	10	25	Hisanori Kohtsuka	Masanori Okanishi
				MO-2021-2			Ophiotrichidae	Ophiomaza	cacaotica	Lyman	1871	2	Koajiro Bay, Kanagawa, Japan																	10				2020	10	19	Hisanori Kohtsuka	Masanori Okanishi
		Op-608		MMBS-EC-023			Ophiotrichidae	Ophiothela	danae	Verrill	1869	2																						2006	7	28		Masanori Okanishi
		Op-719		2780	2		Ophiotrichidae	Ophiothela	danae	Verrill	1869	8	Sagami Sea																									Masanori Okanishi
		Op-739		463	1		Ophiotrichidae	Ophiothela	danae	Verrill	1869	4	Araihama, Misaki, Kanagawa, Japan																	2	3			2014	6	26	Hisanori Kohtsuka	Masanori Okanishi
		Op-818		1702	2		Ophiotrichidae	Ophiothela	danae	Verrill	1869	9	Koajiro Inlet, Miura, Kanagawa, Japan																	5	5			2015	10	9	Hisanori Kohtsuka	Masanori Okanishi
		Op-933		MMBS-EC-03			Ophiotrichidae	Ophiothela	danae	Verrill	1869	4	Aburatsubo, Misaki, Miura, Kanagawa, Japan																	Intertidal zone				2006	5	30	Yuji Ise et al. (Marine Course Teaching)	Masanori Okanishi
		Op-936		MMBS-EC-08			Ophiotrichidae	Ophiothela	danae	Verrill	1869	1	Entrance os Moroiso Inlet, Miura, Kanagawa, Japan																	Intertidal zone				2006	6	12	Yuji Ise et al. (Marine Course Teaching)	Masanori Okanishi
				MO-23			Ophiotrichidae	Ophiothela	danae	Verrill	1869	1	Entrance of Koajiro Inlet, Miura, Kanagawa, Japan	35	09	450		139	36	570										4.5	5.5		St.3	2015	1	19	Hisanori Kohtsuka	Masanori Okanishi
	D77			MO-2014-3			Ophiotrichidae	Ophiothela	danae	Verrill	1869	10<	Off Jogashima, Misaki, Miura, Kanagawa, Japan																	40				2012	1	9	Hisanori Kohtsuka, Michiyo Kawabata, Kohei Otomo, Ryosuke Kimbara, Masanori Okanishi	Masanori Okanishi
		Op-533					Ophiotrichidae	Ophiothrix	exigua	Lütken	1874	1	Araihama, Misaki, Miura, Miura, Kanagawa, Japan																					2012	6	5	Hisanori Kohtsuka	Masanori Okanishi
		Op-534					Ophiotrichidae	Ophiothrix	exigua	Lyman	1874	1	Araihama, Misaki, Miura, Miura, Kanagawa, Japan																					2012	6	5	Hisanori Kohtsuka	Masanori Okanishi
		Op-593		MMBS-EC-014			Ophiotrichidae	Ophiothrix	exigua	Lyman	1874	5	Entrance of Koajiro Inlet, Miura, Kanagawa, Japan																					2006	6	14		Masanori Okanishi
		Op-702		815	1		Ophiotrichidae	Ophiothrix	exigua	Lyman	1874	7	Off Shomoda, Shizuoka, Japan	34	38	785	N	138	56	646	E	34	38	648	N	138	56	394	E	40.5	42.3	R/V Tsukuba II	St. 2	2014	11	27	Hisanori Kohtsuka	Masanori Okanishi
		Op-710		1296			Ophiotrichidae	Ophiothrix	exigua	Lyman	1874	1	West of Jogashima, Misaki, Miura, Kanagawa, Japan	35	08	498	N	139	34	611	E	35	08	433	N	139	34	481	E	86.2	88.0	R/V Rinkai-Maru	St. 2	2015	5	21	Hisanori Kohtsuka	Masanori Okanishi
		Op-769		3229	3		Ophiotrichidae	Ophiothrix	exigua	Lyman	1874	1	West of Jogashima, Misaki, Miura, Kanagawa, Japan	35	09	0033	N	139	35	0001	E	35	08	6171	N	139	34	8529	E	75.9	79.7	R/V Rinkai-Maru	St. 5	2018	2	22	Hisanori Kohtsuka	Masanori Okanishi
		Op-935		MMBS-EC-09			Ophiotrichidae	Ophiothrix	exigua	Lyman	1874	1	Entrance os Moroiso Inlet, Miura, Kanagawa, Japan																	Intertidal zone	-	-	-	2006	6	12	Yuji Ise	Masanori Okanishi
		Op-503					Ophiotrichidae	Ophiothrix	nereidina	Lamarck	1816	1	Araihama, Misaki, Kanagawa, Japan																					2010			Hisanori Kohtsuka	Masanori Okanishi
		Op-944		130117			Ophiotrichidae	Ophiothrix	nereidina	Lamarck	1816	1	Kagoshima, Araihama, Misaki, Miura, Kanagawa, Japan																	4	4			2013	1	17	Hisanori Kohtsuka	Masanori Okanishi
				2717	2		Ophiotrichidae	Ophiothrix	panchyendyta	H. L. Clark	1911	5	Off Jogashima, Misaki, Miura, Kanagawa, Japan	35	06	929	N	139	33	814	E	35	06	644	N	139	33	739	E	360	365	R/V Rinkai-Maru	St. 1	2017	2	15	Hisanori Kohtsuka	Masanori Okanishi
				151112St.2			Ophiotrichidae	Ophiothrix	panchyendyta	H. L. Clark	1911	1	Suruga Gulf, Off Minami Izu, Kanagawa, Japan	34	39	316	N	138	43	857	E	34	39	322	N	138	43	546	E	177	230	R/V TsukubaII		2015	11	12	Hisanori Kohtsuka	Masanori Okanishi
		Op-490					Ophiotrichidae	Ophiothrix	panchyendyta	H. L. Clark	1911	3	Off Jogashima, Misaki, Miura, Kanagawa, Japan																				１回目	2011	10	24	Hisanori Kohtsuka	Masanori Okanishi
		Op-561					Ophiotrichidae	Ophiothrix	panchyendyta	H. L. Clark	1911	2	West of Jogashima, Misaki, Miura, Kanagawa, Japan	35	07	538	N	139	33	058	E	35	08	179	N	139	32	353	E	316	264		St. 1	2010	6	2	Hisanori Kohtsuka	Masanori Okanishi
		Op-613		MMBS-EC-036			Ophiotrichidae	Ophiothrix	panchyendyta	H. L. Clark	1911	1	Off Tateyama, Chiba, Japan																	130								Masanori Okanishi
		Op-617		140219St.2	2		Ophiotrichidae	Ophiothrix	panchyendyta	H. L. Clark	1911	1	Sagami Sea	35	06	139	N	139	34	232	E	35	05	862	N	139	34	089	E	238	291	R/V Rinkai-Maru	St. 2	2014	2	19	Hisanori Kohtsuka	Masanori Okanishi
		Op-652		3342	4		Ophiotrichidae	Ophiothrix	panchyendyta	H. L. Clark	1911	1	West of Jogashima, Misaki, Miura, Kanagawa, Japan	35	08	3986	N	139	32	9517	E	35	08	3281	N	139	32	5683	E	108	198	R/V Rinkai-Maru	St. 2	2018	4	17	Hisanori Kohtsuka	Masanori Okanishi
		Op-662		960	2		Ophiotrichidae	Ophiothrix	panchyendyta	H. L. Clark	1911	10	Off Jogashima, Misaki, Miura, Kanagawa, Japan	35	08	5591	N	139	32	7390	E	35	08	4585	N	139	32	2040	E	133	274	R/V Rinkai-Maru	St. 2	2015	2	12	Hisanori Kohtsuka	Masanori Okanishi
NSMT	13849	Op-699		1571	2		Ophiotrichidae	Ophiothrix	panchyendyta	H. L. Clark	1911	1	West of Jogashima, Misaki, Miura, Kanagawa, Japan	35	07	239	N	139	33	522	E	35	07	389	N	139	33	209	E	267	309	R/V Rinkai-Maru	St. 3	2014	10	20	Hisanori Kohtsuka	Masanori Okanishi
		Op-761		3303	3		Ophiotrichidae	Ophiothrix	panchyendyta	H. L. Clark	1911	3	West of Jogashima, Misaki, Miura, Kanagawa, Japan	35	8	494	N	139	34	564	E	35	08	653	N	139	34	212	E	86.6	90.7	R/V Rinkai-Maru	st.3	2018	04	05	Hisanori Kohtsuka	Masanori Okanishi
		Op-775		1041	3		Ophiotrichidae	Ophiothrix	panchyendyta	H. L. Clark	1911	1	West of Jogashima, Misaki, Miura, Kanagawa, Japan	35	7	6442	N	139	34	3682	E	35	07	3441	N	139	34	3072	E	98.8	184		st.2	2015	03	09	Hisanori Kohtsuka	Masanori Okanishi
		Op-791		2741	5		Ophiotrichidae	Ophiothrix	panchyendyta	H. L. Clark	1911	1	West of Jogashima, Misaki, Miura, Kanagawa, Japan	35	08	398	N	139	32	875	E	35	08	096	N	139	32	854	E	112	143	R/V Rinkai-Maru	St. 4	2017	2	15	Hisanori Kohtsuka	Masanori Okanishi
		Op-799		598	5		Ophiotrichidae	Ophiothrix	panchyendyta	H. L. Clark	1911	1	Off Jogashima, Misaki, Miura, Kanagawa, Japan	35	08	359	N	139	34	753	E	35	08	649	N	139	34	328	E	85.5	91.4	R/V Rinkai-Maru	St. 1	2014	7	28	Hisanori Kohtsuka	Masanori Okanishi
		Op-836		130214St,2	3		Ophiotrichidae	Ophiothrix	panchyendyta	H. L. Clark	1911	4	Off Jogashima, Misaki, Miura, Kanagawa, Japan	35	08	324	N	139	35	195	E	35	08	080	N	139	35	245	E	76.4	76.8	R/V Rinkai-Maru	St.2	2013	2	14	Hisanori Kohtsuka	Masanori Okanishi
		Op-868		1848	4		Ophiotrichidae	Ophiothrix	panchyendyta	H. L. Clark	1911	1	West of Jogashima, Misaki, Miura, Kanagawa, Japan	35	7	3455	N	139	34	2564	E	35	07	1502	N	139	33	8646	E	219	320	R/V Rinkai-Maru	St. 4	2015	12	10	Hisanori Kohtsuka	Masanori Okanishi
		Op-921		151112St.2			Ophiotrichidae	Ophiothrix	panchyendyta	H. L. Clark	1911		Suruga Gulf, Off Minami Izu, Kanagawa, Japan	34	39	316	N	138	43	857	E	34	39	322	N	138	43	546	E	177	230	R/V TsukubaII		2015	11	12	Hisanori Kohtsuka	Masanori Okanishi
		Op-1036		120113St.2	7		Ophiotrichidae	Ophiothrix	panchyendyta	H. L. Clark	1911	1	Off Jogashima, Misaki, Miura, Kanagawa, Japan	35	06	041	N	139	34	049	E	35	06	303	N	139	34	465	E	364	158	R/V Rinkai-Maru	St.2	2012	1	13	Hisanori Kohtsuka	Masanori Okanishi
				MO-2021-14			Ophiotrichidae	Ophiothrix	panchyendyta			2	Off Araihama, Misaki, Miura, Miura, Kanagawa, Japan				N					35	10	239	N	139	35	450	E	60	60		St. 2	2021	4	22	Hisanori Kohtsuka, Michiyo Kawabata, Kohei Otomo, Ryosuke Kimbara, Masanori Okanishi	Masanori Okanishi
				MO-2021-40			Ophiotrichidae	Ophiothrix	panchyendyta	H. L. Clark	1911	4	Sagami Sea	35	03	522	N	139	37	433	E	35	04	162	N	139	37	526	E	397	286	R/V Tansei	L-2-200	2007	11	25	Masanori Okanishi	Masanori Okanishi
				3039	3		Ophiuridae	Ophiactis	savignyi	Müller & Troschell	1842	1	Off Tateyama, Chiba, Japan	34	58	559	N	139	46	388	E									30	30	T/V Sagitta VI	St. 1	2017	11	22	Hisanori Kohtsuka	Masanori Okanishi
				1827			Ophiuridae	Ophiura	calyptolepis	H.L. Clark	1911	1	West of Jogashima, Misaki, Miura, Kanagawa, Japan	35	07	1905	N	139	34	1205	E	35	07	1687	N	139	33	7422	E	294	365	R/V Rinkai-Maru	St. 2	2016	12	9	Hisanori Kohtsuka	Masanori Okanishi
		Op-632		140219St.2	3		Ophiuridae	Ophiura	calyptolepis	H.L. Clark	1911	3	Sagami Sea	35	06	086	N	139	34	232	E	35	05	862	N	139	34	089	E	238	291	R/V Rinkai-Maru	St. 2	2014	2	19	Hisanori Kohtsuka	Masanori Okanishi
		Op-632		140219St.2	3		Ophiuridae	Ophiura	calyptolepis	H.L. Clark	1911	3	Sagami Sea	35	06	086	N	139	34	232	E	35	05	862	N	139	34	089	E	238	291	R/V Rinkai-Maru	St. 2	2014	2	19	Hisanori Kohtsuka	Masanori Okanishi
		Op-676		140123St.1	2		Ophiuridae	Ophiura	calyptolepis	H.L. Clark	1911	1	Sagami Sea	35	07	084	N	139	34	000	E	35	07	112	N	139	34	146	E	258	211	R/V Rinkai-Maru	St. 1	2014	1	23	Hisanori Kohtsuka	Masanori Okanishi
		Op-691		1827	1	2	Ophiuridae	Ophiura	calyptolepis	H.L. Clark	1911	1	West of Jogashima, Misaki, Miura, Kanagawa, Japan	35	07	1905	N	139	34	1205	E	35	07	1687	N	139	33	7422	E	294	365	R/V Rinkai-Maru	St. 2	2016	12	9	Hisanori Kohtsuka	Masanori Okanishi
		Op-766		2717	4		Ophiuridae	Ophiura	calyptolepis	H. L. Clark	1911	1	Off Jogashima, Misaki, Miura, Kanagawa, Japan	35	06	929	N	139	33	814	E	35	06	644	N	139	33	739	E	360	365	R/V Rinkai-Maru	St. 1	2017	2	15	Hisanori Kohtsuka	Masanori Okanishi
		Op-766		2717	4		Ophiuridae	Ophiura	calyptolepis	H. L. Clark	1911	1	Off Jogashima, Misaki, Miura, Kanagawa, Japan	35	06	929	N	139	33	814	E	35	06	644	N	139	33	739	E	360	365	R/V Rinkai-Maru	St. 1	2017	2	15	Hisanori Kohtsuka	Masanori Okanishi
		Op-860		130617St.3	1		Ophiuridae	Ophiura	calyptolepis	H. L. Clark	1911	1	Off Jogashima, Misaki, Miura, Kanagawa, Japan	35	06	251	N	139	34	442	E	35	06	613	N	139	33	850	E	147	335		St. 3	2013	6	17	Hisanori Kohtsuka	Masanori Okanishi
		Op-861		140219St.2	2	2	Ophiuridae	Ophiura	calyptolepis	H. L. Clark	1911	1	Sagami Sea	35	06	086	N	139	34	232	E	35	05	862	N	139	34	089	E	238	291	R/V Rinkai-Maru	St. 2	2014	2	19	Hisanori Kohtsuka	Masanori Okanishi
		Op-633		1906	2	1	Ophiuridae	Ophiura	cryptolepis	H.L. Clark	1911	2	Off Jogashima, Misaki, Miura, Kanagawa, Japan	35	06	9987	N	139	33	6545	E	35	06	9566	N	139	33	2123	E	473	600	R/V Rinkai-Maru	St. 1	2016	2	18	Hisanori Kohtsuka	Masanori Okanishi
		Op-633		1906	2	1	Ophiuridae	Ophiura	cryptolepis	H.L. Clark	1911	2	Off Jogashima, Misaki, Miura, Kanagawa, Japan	35	06	9987	N	139	33	6545	E	35	06	9566	N	139	33	2123	E	473	600	R/V Rinkai-Maru	St. 1	2016	2	18	Hisanori Kohtsuka	Masanori Okanishi
		Op445	1				Ophiuridae	Ophiuroglypha	kinbergi	Ljungman	1866	11	Entrance of Koajiro Inlet, Miura, Kanagawa, Japan																	15	15			2009	7	30	Hisanori Kohtsuka	Masanori Okanishi
		Op-486					Ophiuridae	Ophiuroglypha	kinbergi	Ljungman	1866	1	Off MarinePark, Misaki, Miura, Kanagawa, Japan																	50				2011	9	15	Hisanori Kohtsuka	Masanori Okanishi
		Op-499					Ophiuridae	Ophiuroglypha	kinbergi	Ljungman	1866	2	Off Jogashima, Misaki, Miura, Kanagawa, Japan																	80				2011	10	27	Hisanori Kohtsuka	Masanori Okanishi
		Op-596		MMBS-EC-022			Ophiuridae	Ophiuroglypha	kinbergi	Ljungman	1866	1	Koajiro Bay, Kanagawa, Japan																					2006	7	31		Masanori Okanishi
		Op-671		140124St.2DG	1		Ophiuridae	Ophiuroglypha	kinbergi	Ljungman	1866	10	Sagami Sea																	4.5			St. 2	2014	1	24	Hisanori Kohtsuka	Masanori Okanishi
		Op-686		1174	2		Ophiuridae	Ophiuroglypha	kinbergi	Ljungman	1866	1	Off Koajiro Inlet, Misaki, Kanagawa, Japan	35	10	50	N	139	36	400	E									20	20		st.3	2015	04	09	Hisanori Kohtsuka	Masanori Okanishi
		Op-700		278			Ophiuridae	Ophiuroglypha	kinbergi	Ljungman	1866	1	Moroiso Inlet, Miura, Kanagawa, Japan	35	09	440	N	139	36	680	E									4	4			2014	4	3	Hisanori Kohtsuka	Masanori Okanishi
		Op-740		518	1		Ophiuridae	Ophiuroglypha	kinbergi	Ljungman	1866	1	Entrance of Moroiso Inlet, Miura, Kanagawa, Japan																	5	6			2014	7	7	Hisanori Kohtsuka	Masanori Okanishi
		Op-742		669			Ophiuridae	Ophiuroglypha	kinbergi	Ljungman	1866	2	Tachiamamo, Moroiso Inlet, Misaki, Miura, Japan																	6	6		st.1	2014	09	11	Hisanori Kohtsuka	Masanori Okanishi
		Op-750		1642	1		Ophiuridae	Ophiuroglypha	kinbergi	Ljungman	1866	1	West of Jogashima, Misaki, Miura, Kanagawa, Japan	35	09	079	N	139	34	880	E	35	09	162	N	139	34	911	E	78.3	77.2	R/V Rinkai-Maru	St. 1	2015	7	31	Hisanori Kohtsuka	Masanori Okanishi
		Op-771		3039	2		Ophiuridae	Ophiuroglypha	kinbergi	Ljungman	1866	1	Off Tateyama, Chiba, Japan	34	58	559	N	139	46	388	E				N				E	30	30	T/V Sagitta VI	St. 1	2017	11	22	Hisanori Kohtsuka	Masanori Okanishi
		Op-801		2850	2		Ophiuridae	Ophiuroglypha	kinbergi	Ljungman	1866	1	Moroiso Inlet, Miura, Kanagawa, Japan	35	09	395	N	139	36	195	E	35	09	440	N	139	36	205	E	4.1	5.5		St. 2	2017	7	12	Hisanori Kohtsuka	Masanori Okanishi
		Op-809		130724	3		Ophiuridae	Ophiuroglypha	kinbergi	Ljungman	1866	1	Sagami Sea	35	08	913	N	139	34	268	E	35	08	993	N	139	34	809	E					2013	7	24	Hisanori Kohtsuka	Masanori Okanishi
		Op-820		140123St.3	4		Ophiuridae	Ophiuroglypha	kinbergi	Ljungman	1866	1	Sagami Sea	35	09	305	N	139	35	208	E	35	09	481	N	139	35	151	E	72	75.9	R/V Rinkai-Maru	St. 3	2014	1	23	Hisanori Kohtsuka	Masanori Okanishi
NSMT	13850	Op-821		1896	2		Ophiuridae	Ophiuroglypha	kinbergi	Ljungman	1866	1	Entrance os Moroiso Inlet, Miura, Kanagawa, Japan	35	09	440	N	139	36	540	E				N				E	5	4.2		St. 1	2016	1	22	Hisanori Kohtsuka	Masanori Okanishi
		Op-844		140219St.1	2		Ophiuridae	Ophiuroglypha	kinbergi	Ljungman	1866	1	Off Jogashima, Misaki, Miura, Kanagawa, Japan	35	08	471	N	139	34	748	E	35	08	191	N	139	34	644	E	85	89.1	R/V Rinkai-Maru	St. 1	2014	2	19	Hisanori Kohtsuka	Masanori Okanishi
		Op-903		121219	4		Ophiuridae	Ophiuroglypha	kinbergi	Ljungman	1866	1	Off Jogashima, Misaki, Miura, Kanagawa, Japan	35	08	316	N	139	35	107	E	35	08	157	N	139	35	097	E	78.6	80	R/V Rinkai-Maru	St. 1	2012	12	19	Hisanori Kohtsuka	Masanori Okanishi
		Oｐ-937		120315St.1			Ophiuridae	Ophiuroglypha	kinbergi	Ljungman	1866	6	Entrance of Koajiro Inlet, Miura, Kanagawa, Japan																	12	12		St.1	2012	3	15	Hisanori Kohtsuka	Masanori Okanishi
		Op-1073		130314St.2			Ophiuridae	Ophiuroglypha	kinbergi	Ljungman	1866	2	Entrance of Koajiro Inlet, Miura, Kanagawa, Japan																	11			St. 2	2013	3	14	Hisanori Kohtsuka	Masanori Okanishi
				MO-18			Ophiuridae	Ophiuroglypha	kinbergi	Ljungman	1866	10<	Water intank at Araihama, Misaki, Miura, Kanagawa, Japan	35	09	533		139	36	460	E									7	10		St.1	2015	1	19	Hisanori Kohtsuka	Masanori Okanishi
				MO-27			Ophiuridae	Ophiuroglypha	kinbergi	Ljungman	1866	1	Tachiamamo, Moroiso Inlet, Misaki, Miura, Japan	35	09	380		139	36	890	E									3	3.5		St.5	2015	1	19	Hisanori Kohtsuka	Masanori Okanishi
				1889	4		Ophiuridae	Ophiura	ooplax	H. L. Clark	1911	2	West of Jogashima, Misaki, Miura, Kanagawa, Japan	35	07	746	N	139	33	4213	E	35	07	37	N	139	33	6856	E	419	519	R/V Rinkai-Maru	St. 6	2015	12	10	Hisanori Kohtsuka	Masanori Okanishi
				MO-2021-58			Ophiuridae	Ophiura	ooplax	H. L. Clark	1911	1	Sagami Sea	35	03	965	N	139	34	934	E	35	04	268	N	139	34	957	E	604	407	R/V Tansei	L-2'-600	2007	11	28	Masanori Okanishi	Masanori Okanishi
				MO-2021-63			Ophiuridae	Ophiura	ooplax	H. L. Clark	1911	4	Sagami Sea	35	03	965	N	139	34	934	E	35	04	268	N	139	34	957	E	604	407	R/V Tansei	L-2'-600	2007	11	28	Masanori Okanishi	Masanori Okanishi
		Op-785		3024	4		Ophiuridae	Ophiura	paucisquama	Matsumoto	1917	1	Off Jogashima, Misaki, Miura, Kanagawa, Japan																			R/V Shinyo		2017	10	27	Hisanori Kohtsuka	Masanori Okanishi
		Op-721		2487			Ophiuridae	Stegophiura	vivipara	Matsumoto	1915	3	West of Jogashima, Misaki, Miura, Kanagawa, Japan	35	08	517	N	139	33	939	E	35	08	619	N	139	33	960	E	92.1	94.5	R/V Rinkai-Maru	St. 3	2016	10	18	Hisanori Kohtsuka	Masanori Okanishi
		Op-774		3229	4		Ophiuridae	Stegophiura	vivipara	Matsumoto	1915	1	West of Jogashima, Misaki, Miura, Kanagawa, Japan	35	09	0033	N	139	35	0001	E	35	08	6171	N	139	34	8529	E	75.9	79.7	R/V Rinkai-Maru	St. 5	2018	2	22	Hisanori Kohtsuka	Masanori Okanishi
